# Supplementary material for: Unusual Ni⋯Ni interaction in Ni(ii) complexes as potential inhibitors for the development of new anti-SARS-CoV-2 Omicron drugs
Source: Royal Society of Chemistry journal article supplement (doi:10.1039/d3md00601h), 2024-01-01
Supplement: d3md00601h1.pdf [file d3md00601h1.pdf]

ARTICLE

**Unusual Ni...Ni interaction in Ni(II) complexes as potential inhibitors for the development of new anti-SARS-CoV-2 Omicron drugs**

Simranjeet Singh<sup>a</sup>, and Mukesh Choudhary<sup>a\*</sup>

---

<sup>a</sup> Department of Chemistry, National Institute of Technology Patna, Patna-800005 (Bihar) India.

<sup>a</sup>. \*Corresponding author: [mukesh@nitp.ac.in](mailto:mukesh@nitp.ac.in)

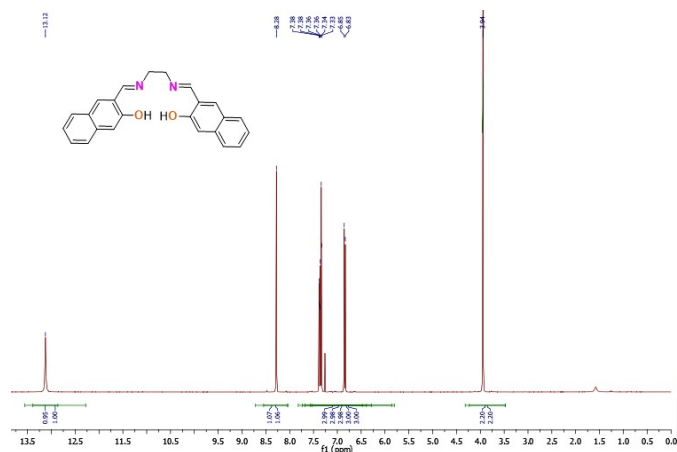Figure S1.  $^1\text{H}$ -NMR spectra of the salen-type  $\text{N}_2\text{O}_2$  donor ligand ( $\text{H}_2\text{L}$ ).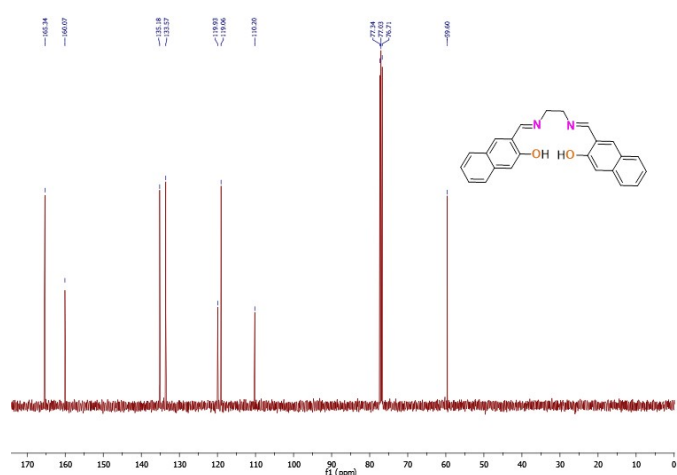Figure S2.  $^{13}\text{C}$ -NMR spectra of the salen-type  $\text{N}_2\text{O}_2$  donor ligand ( $\text{H}_2\text{L}$ ).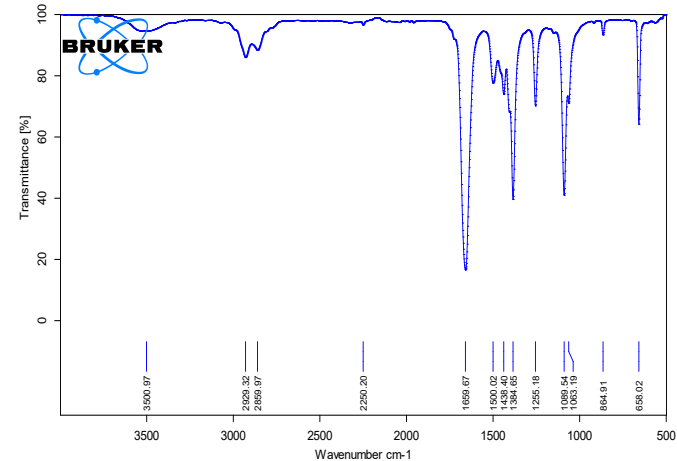Figure S3. FT-IR spectra of the salen-type Schiff base ligand ( $\text{H}_2\text{L}$ ).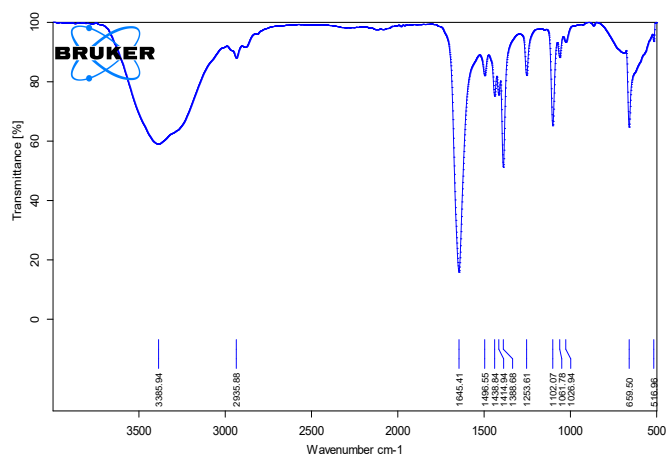Figure S4. FT-IR spectra of the nickel(II) complex  $[\text{Ni}(\text{L})]_2(\mathbf{1})$ .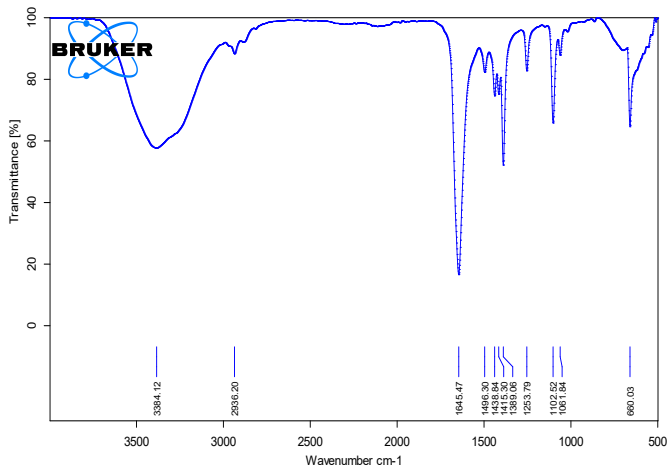Figure S5. FT-IR spectra of the nickel(II) complex  $[\text{Ni}(\text{L})]_n(\mathbf{2})$ .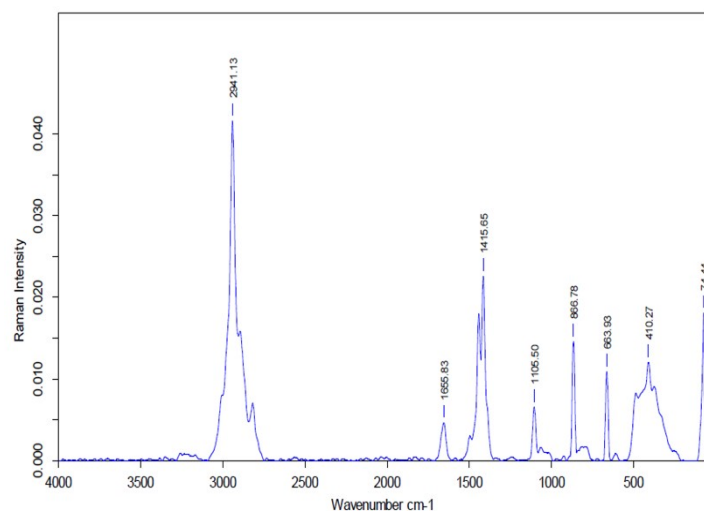Figure S6. FT-Raman spectra of the nickel(II) complex  $[\text{Ni}(\text{L})]_2(\mathbf{1})$  of salen-type Schiff base ligand ( $\text{H}_2\text{L}$ ).

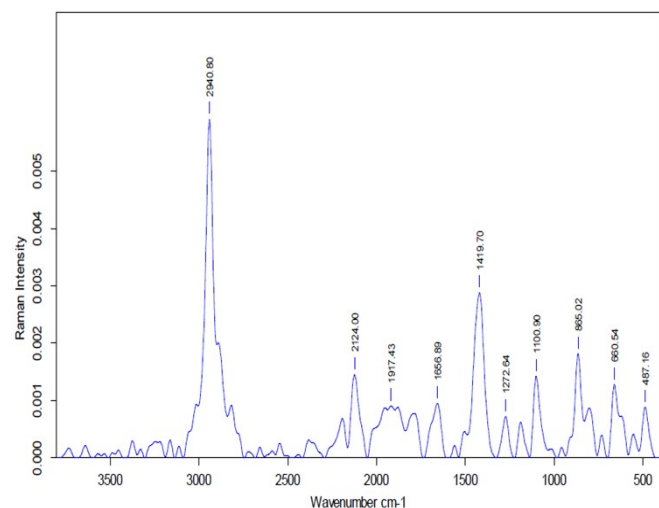

**Figure S7.** FT-Raman spectra of the nickel(II) complex  $[\text{Ni}(\text{L})]_n(\mathbf{2})$  of salen-type Schiff base ligand ( $\text{H}_2\text{L}$ ).

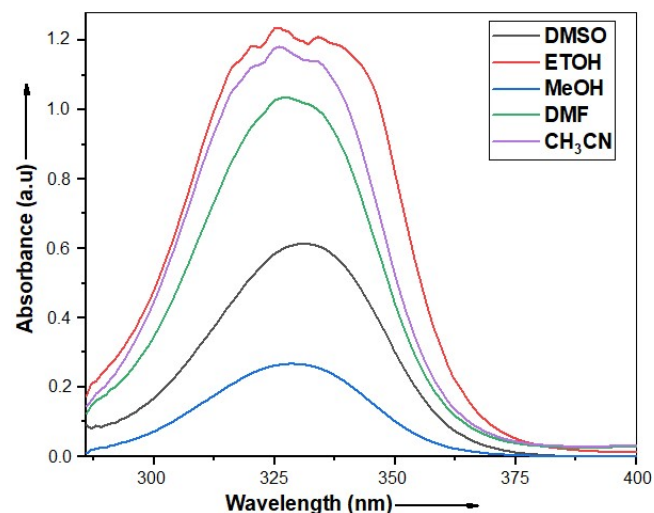

**Figure S8.** UV-Vis spectrum of the salen-type Schiff base ligand ( $\text{H}_2\text{L}$ ) in different solvents at RT in  $3 \times 10^{-3}$  M.

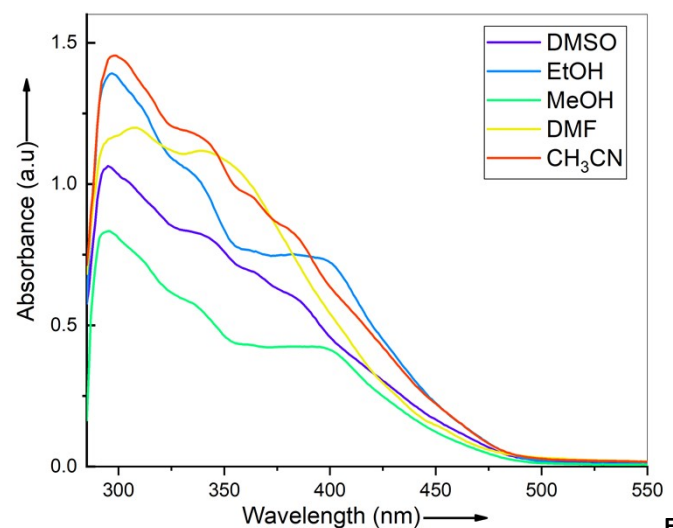

**Figure S9.** UV-Vis spectrum of the Ni(II) coordination complex  $[\text{Ni}(\text{L})]_2(\mathbf{1})$  in different solvents ( $3 \times 10^{-3}$  M) at RT.

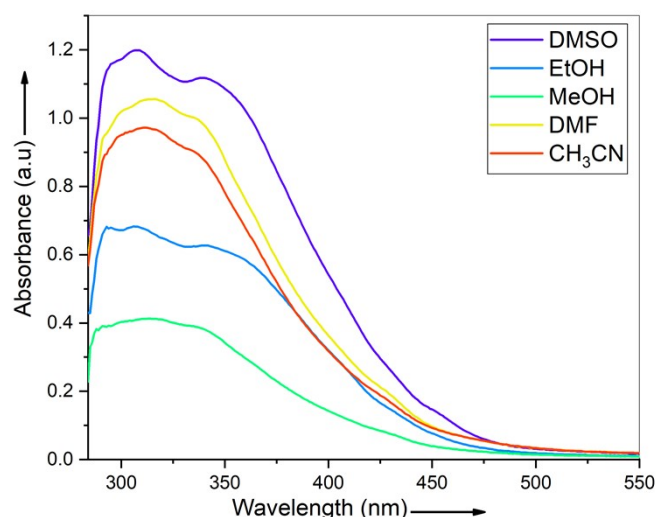

**Figure S10.** UV-Vis spectrum of the Ni(II) coordination complex  $[\text{Ni}(\text{L})]_n(\mathbf{2})$  in different solvents ( $1 \times 10^{-3}$  M) at RT.

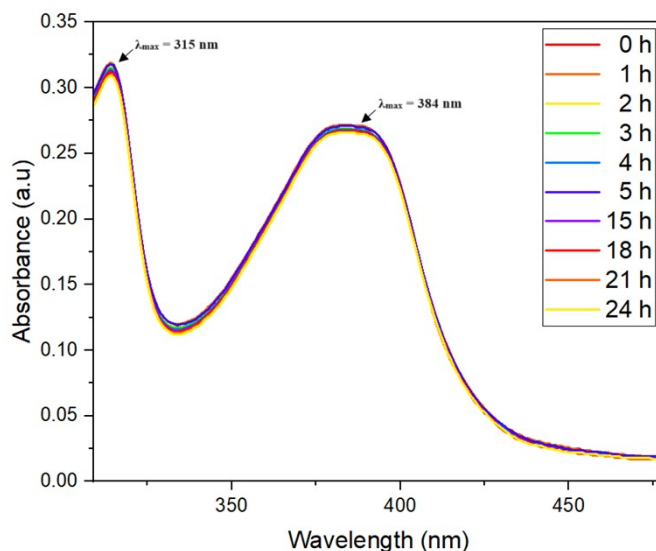

**Figure S11.** A representative time-dependant UV-vis spectrum of the nickel(II) coordination complex  $[\text{Ni}(\text{L})]_2(\mathbf{1})$  in the aqueous solution using Milli-Q water ( $5 \mu\text{M}$ ) at regular intervals of time.

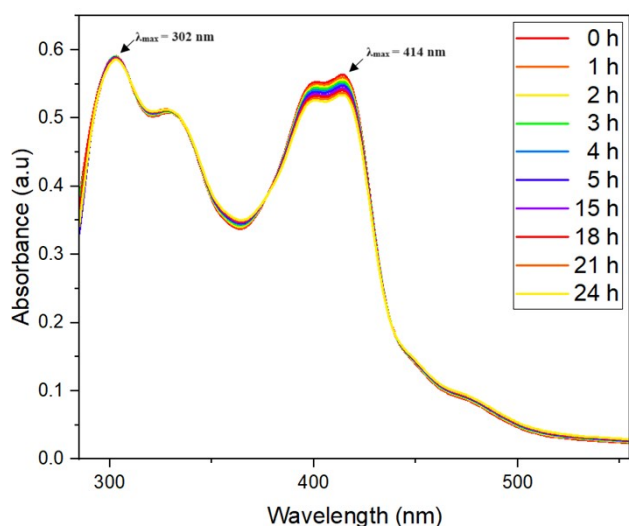

**Figure S12.** A representative time-dependent UV-vis spectrum of the nickel(II) coordination complex  $[\text{Ni}(\text{L})]_n(\mathbf{2})$  in the aqueous solution using Milli-Q water ( $5\mu\text{M}$ ) at regular intervals of time.

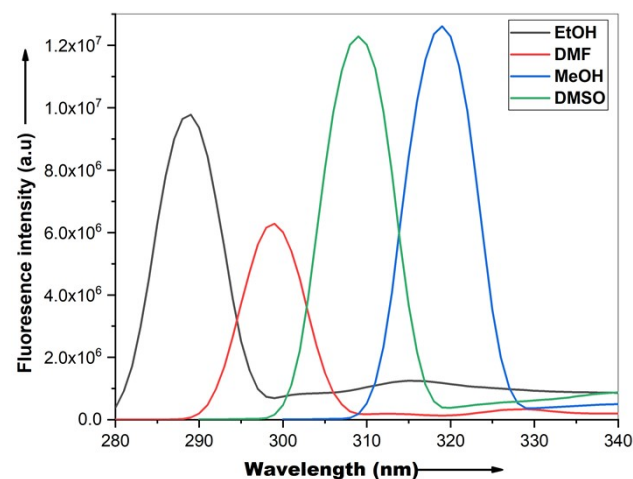

**Figure S13.** Fluorescence spectra of the salen-type Schiff base ligand ( $\text{H}_2\text{L}$ ).

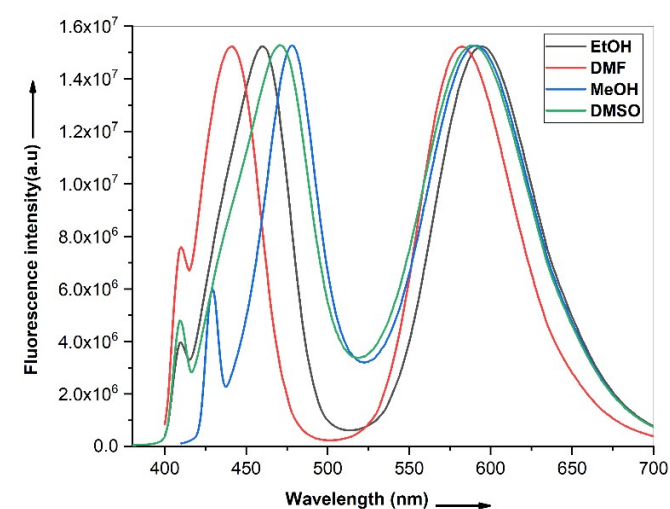

**Figure S14.** Fluorescence spectra of the  $\text{Ni}(\text{II})$  coordination complex  $[\text{Ni}(\text{L})]_2(\mathbf{1})$  of salen-type Schiff base ligand ( $\text{H}_2\text{L}$ ).

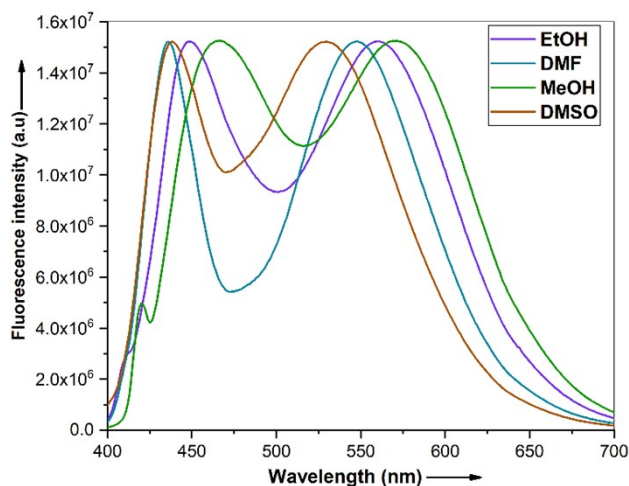

**Figure S15.** Fluorescence spectra of the  $\text{Ni}(\text{II})$  coordination complex  $[\text{Ni}(\text{L})]_n(\mathbf{2})$  of salen-type Schiff base ligand ( $\text{H}_2\text{L}$ ).

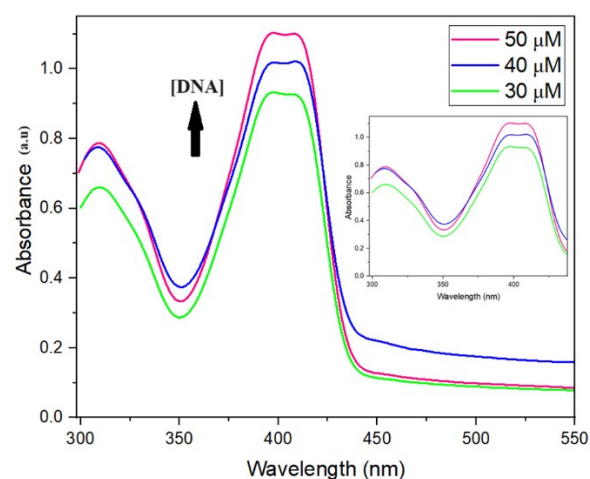

**Figure S16.** UV-Vis spectrum of the  $\text{Ni}(\text{II})$  coordination complex  $[\text{Ni}(\text{L})]_2(\mathbf{1})$  of salen-type Schiff base ligand ( $\text{H}_2\text{L}$ ) bound to CT-DNA at different concentrations ( $30\text{--}50\mu\text{M}$ ).

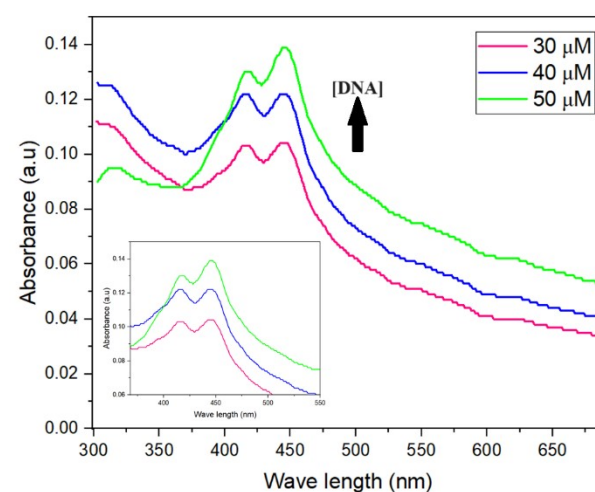

**Figure S17.** UV-Vis spectrum of the  $\text{Ni}(\text{II})$  coordination complex  $[\text{Ni}(\text{L})]_n(\mathbf{2})$  of salen-type Schiff base ligand ( $\text{H}_2\text{L}$ ) bound to CT-DNA at different concentrations ( $30\text{--}50\mu\text{M}$ ).

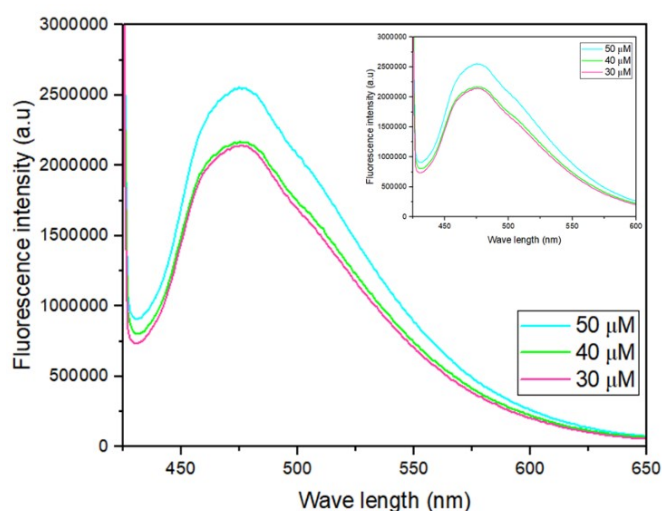

**Figure S18.** Fluorescence spectra of the Ni(II) coordination complex  $[\text{Ni}(\text{L})]_2(\mathbf{1})$  of salen-type Schiff base ligand ( $\text{H}_2\text{L}$ ) bound to CT-DNA at different concentrations (30–50  $\mu\text{M}$ ).

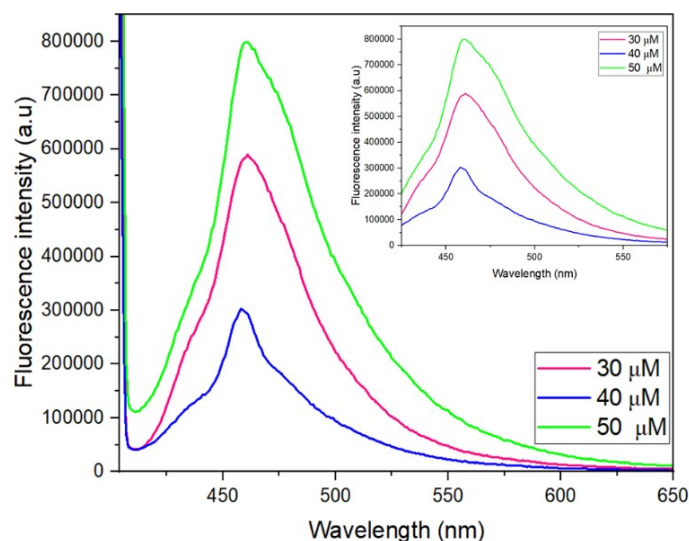

**Figure S19.** Fluorescence spectra of the Ni(II) coordination complex  $[\text{Ni}(\text{L})]_n(\mathbf{2})$  of salen-type Schiff base ligand ( $\text{H}_2\text{L}$ ) bound to CT-DNA at different concentrations (30–50  $\mu\text{M}$ ).

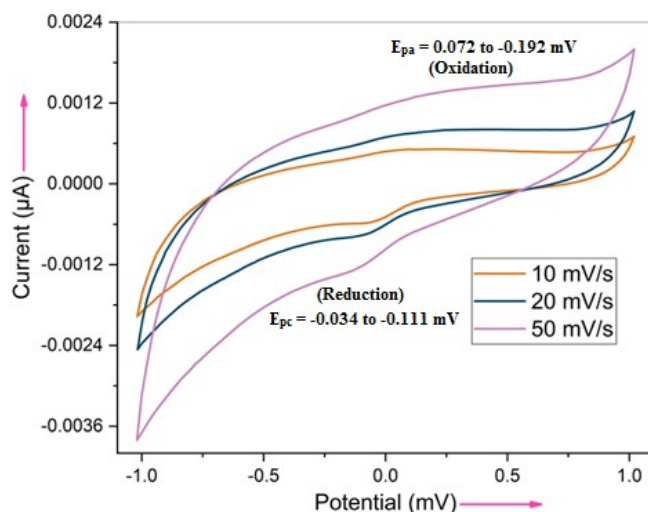

**Figure S20.** Cyclic voltammogram of the Ni(II) coordination complex  $[\text{Ni}(\text{L})]_2(\mathbf{1})$  in 1M DMSO solution with TBAP as supporting electrolyte.

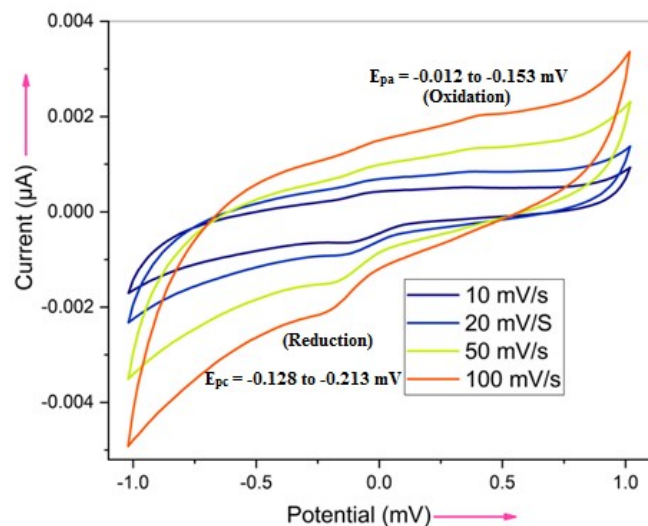

**Figure S21.** Cyclic voltammogram of the Ni(II) coordination complex  $[\text{Ni}(\text{L})]_n(\mathbf{2})$  in 1M DMSO solution with TBAP as supporting electrolyte.

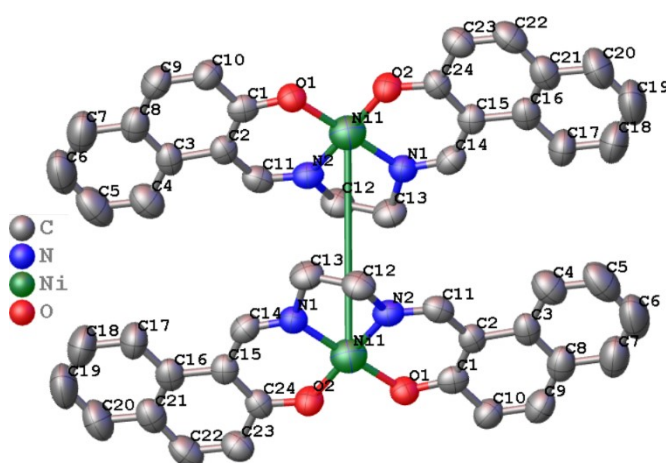

**Figure S22.** Molecular structure of the Ni(II) coordination complex



$[\text{Ni}(\text{L})]_2(\mathbf{1})$  with thermal ellipsoids were drawn at 50 % probability level. Hydrogen atoms are omitted for clarity.

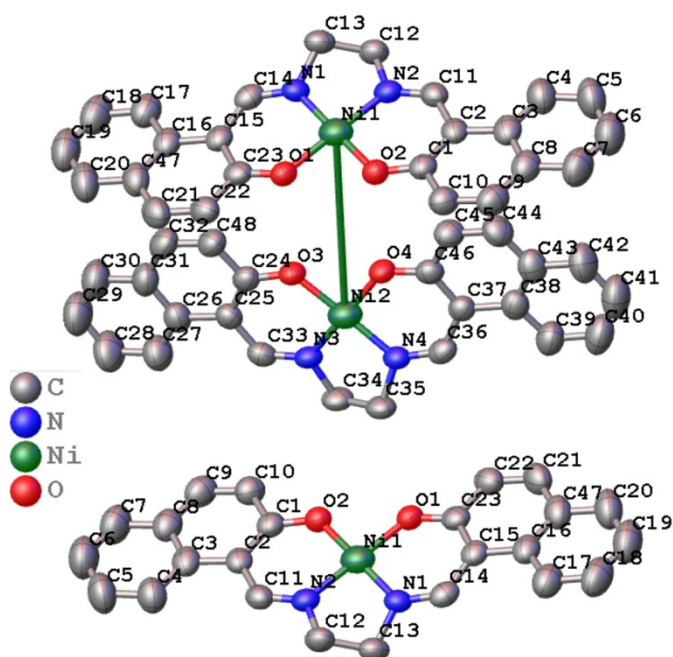

**Figure S23.** Molecular structure of the Ni(II) coordination complex  $[\text{Ni}(\text{L})]_n(\mathbf{2})$  with thermal ellipsoids were drawn at 50 % probability level. Hydrogen atoms are omitted for clarity.

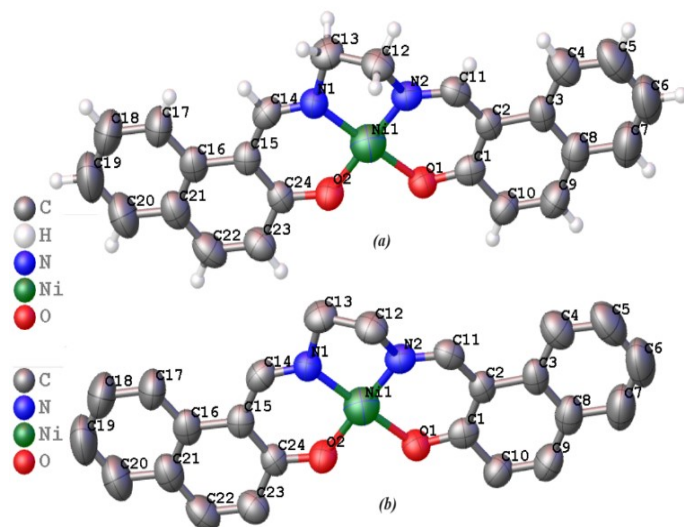

**Figure S24.** Asymmetrical unit representation of the Ni(II) coordination complex  $[\text{Ni}(\text{L})]_2(\mathbf{1})$ ; (a) with thermal ellipsoids were drawn at 50 % probability level, and (b) Hydrogen atoms are omitted for clarity.

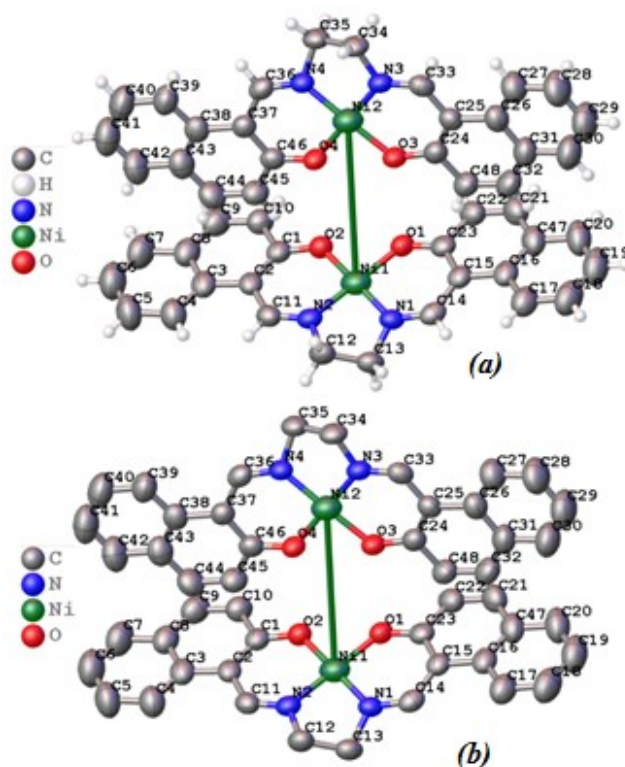

**Figure S25.** Asymmetrical unit representation of the Ni(II) coordination complex  $[\text{Ni}(\text{L})]_n(\mathbf{2})$ ; (a) with thermal ellipsoids were drawn at 50 % probability level, and (b) Hydrogen atoms are omitted for clarity.

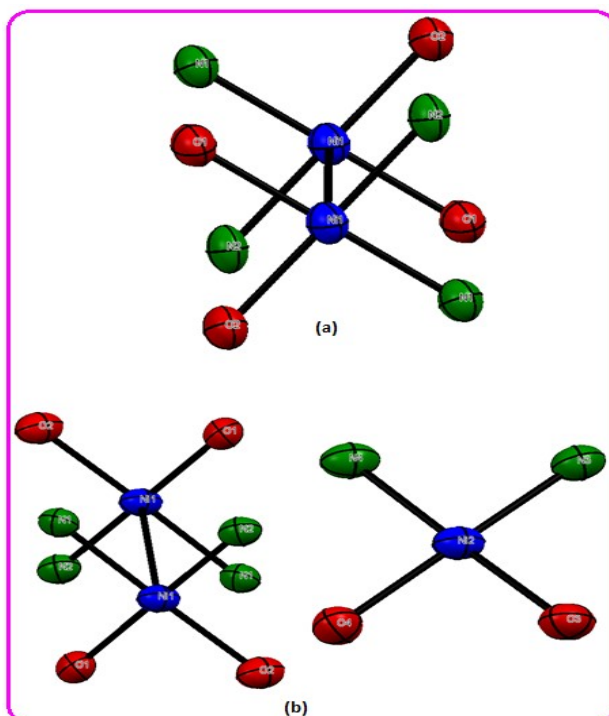

**Figure S26.** (a) and (b) shows the coordination environment of the dimer nickel centres in the Ni(II) coordination complexes  $[\text{Ni}(\text{L})]_2(\mathbf{1})$  and  $[\text{Ni}(\text{L})]_n(\mathbf{2})$  with selective labelling at 293(2)K.

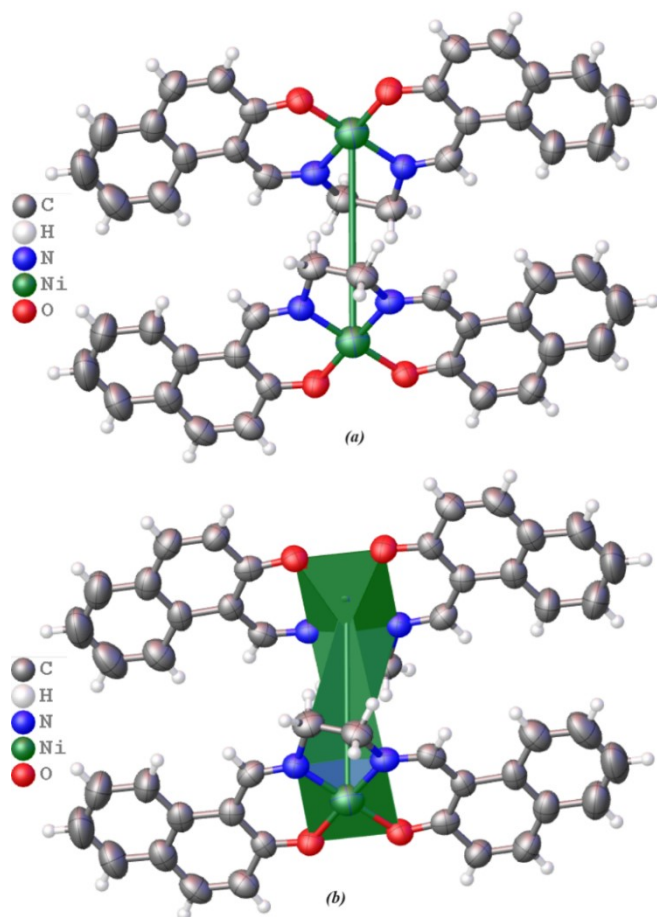

**Figure S27.** (a) Molecular structure and (b) polyhedron network arrangement for the Ni(II) coordination complex  $[\text{Ni}(\text{L})]_2(\mathbf{1})$ .

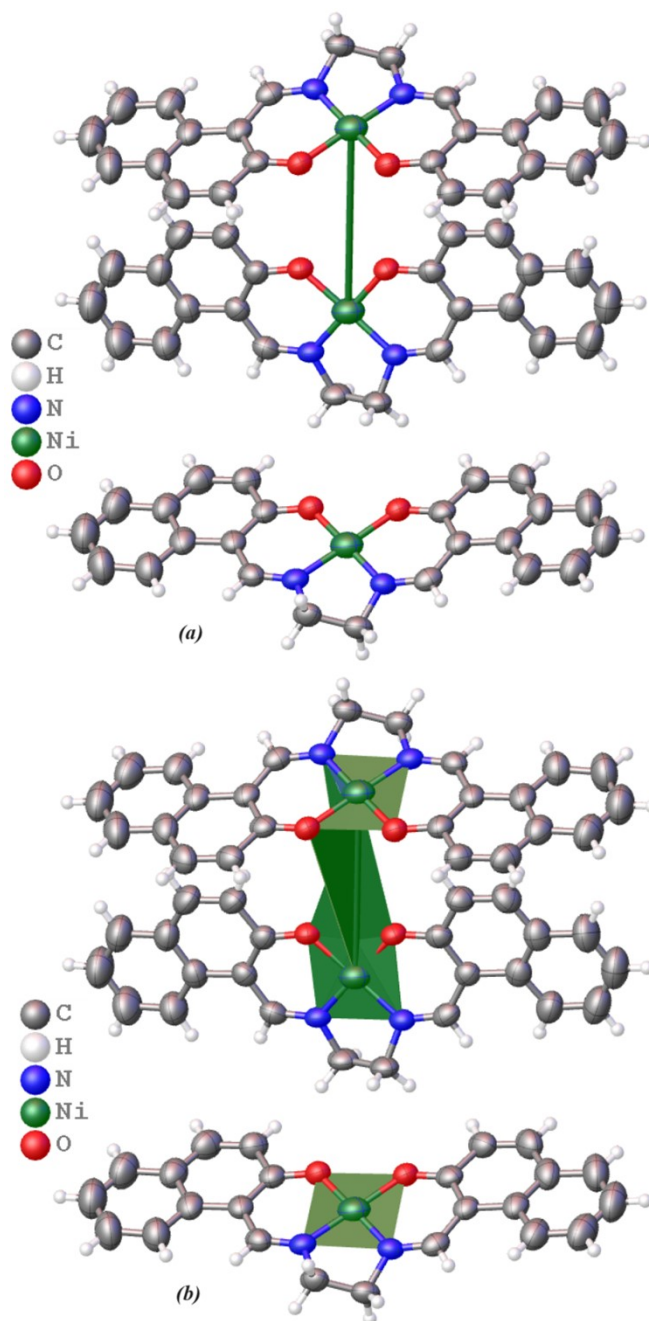

**Figure S28.** (a) Molecular structure and (b) polyhedron network arrangement for the Ni(II) coordination complex  $[\text{Ni}(\text{L})]_n(\mathbf{2})$ .



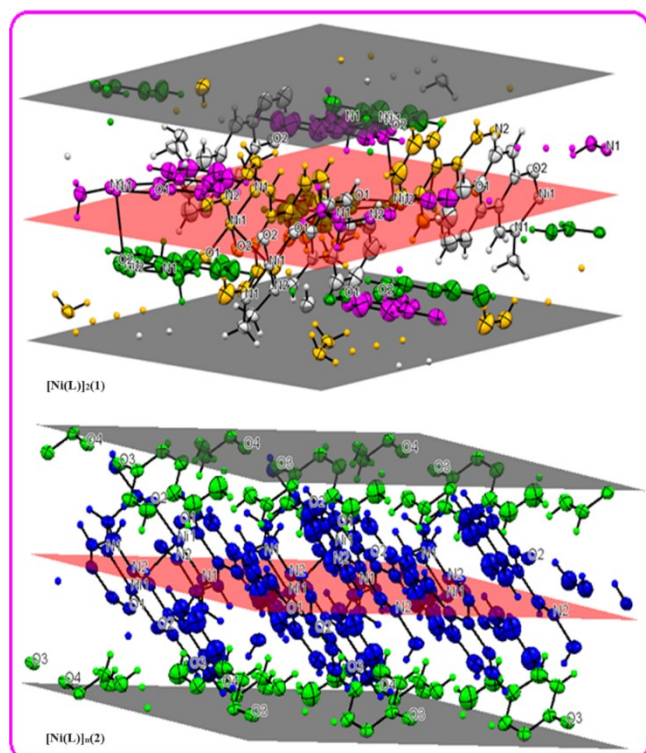

**Figure S29.** Showing slice view with relative area (0.043) in plane (011) whose the molecules centroid fitted for the Ni(II) coordination complexes  $[\text{Ni}(\text{L})]_2(\mathbf{1})$  and  $[\text{Ni}(\text{L})]_n(\mathbf{2})$ .

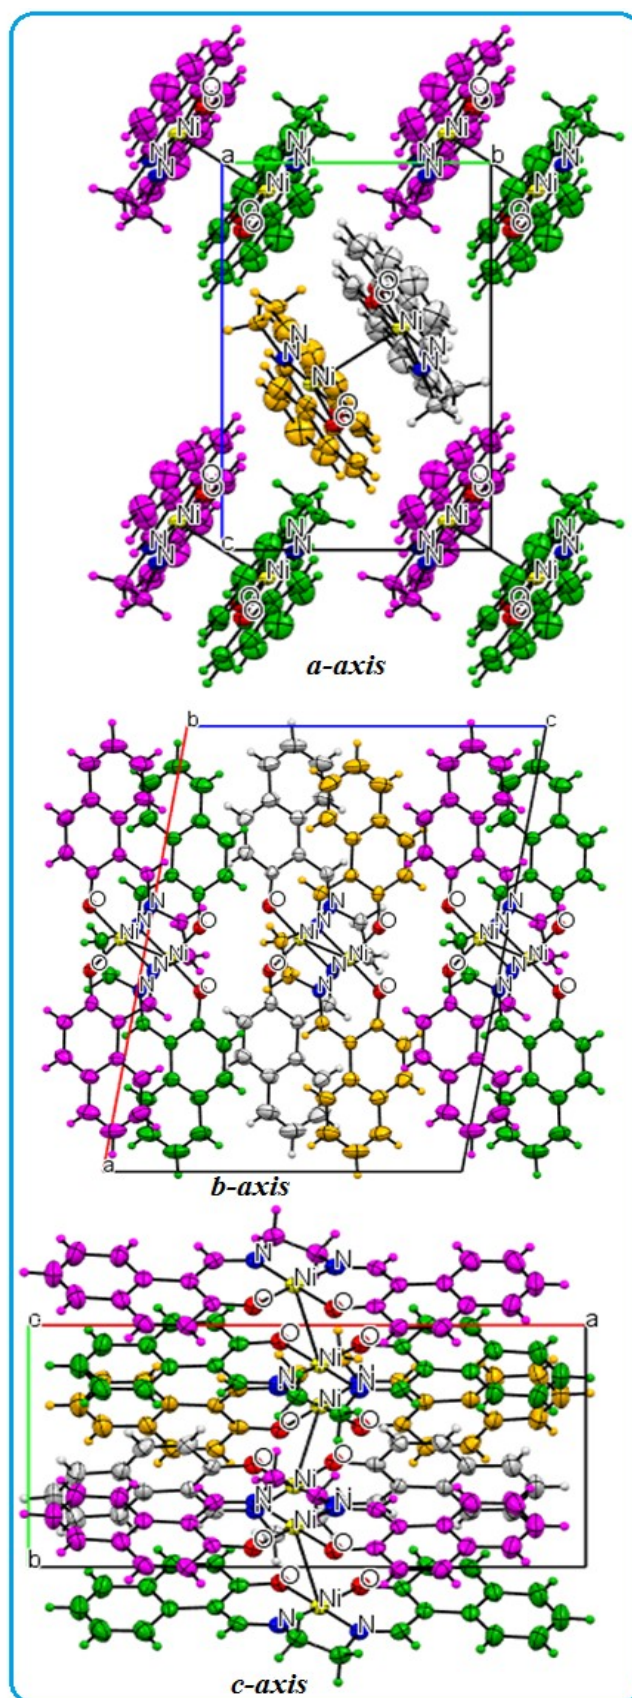

**Figure S30.** Packing view of the Ni(II) coordination complex  $[\text{Ni}(\text{L})]_2(\mathbf{1})$  (along the  $a$ - $c$ -axis).



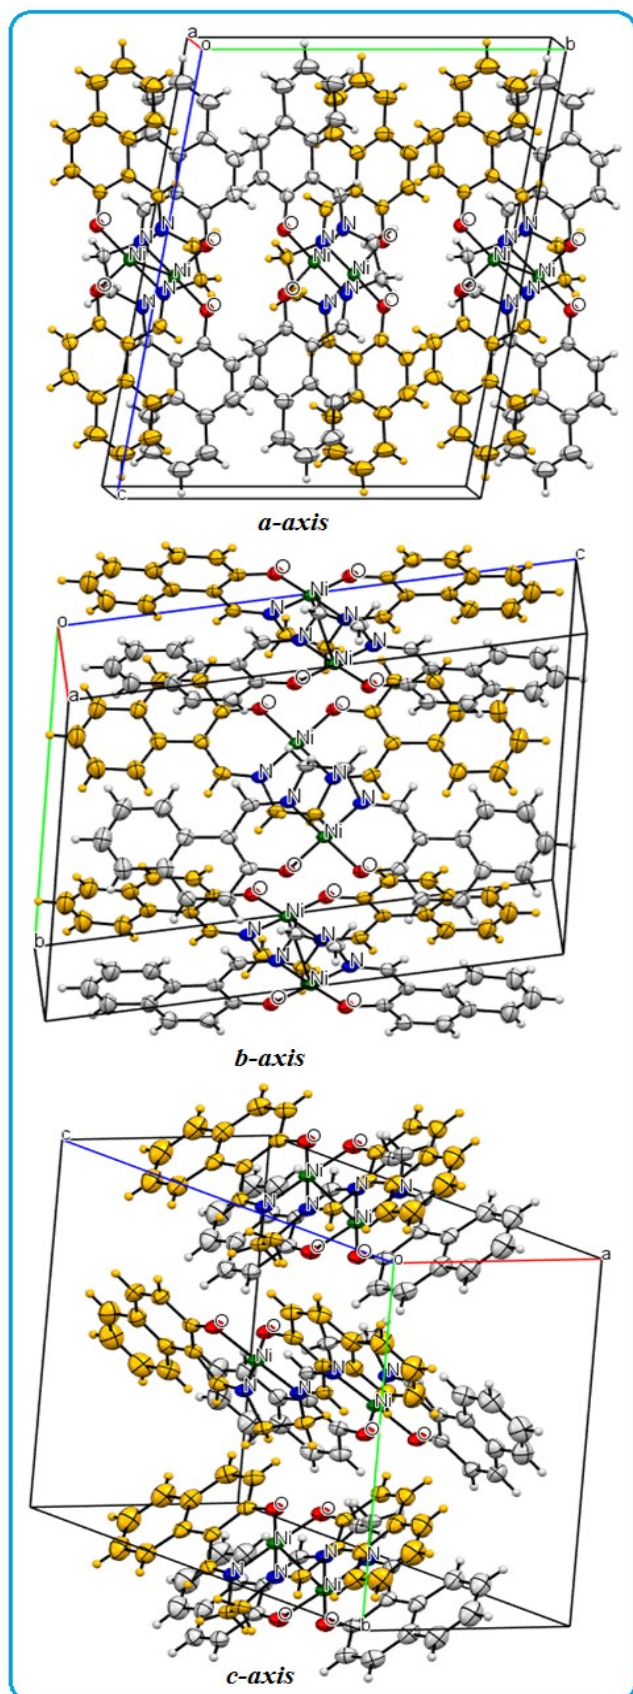

**Figure S31.** Packing view of the Ni(II) coordination complex  $[\text{Ni}(\text{L})]_n(\mathbf{2})$  (along the  $a$ - $c$ -axis).

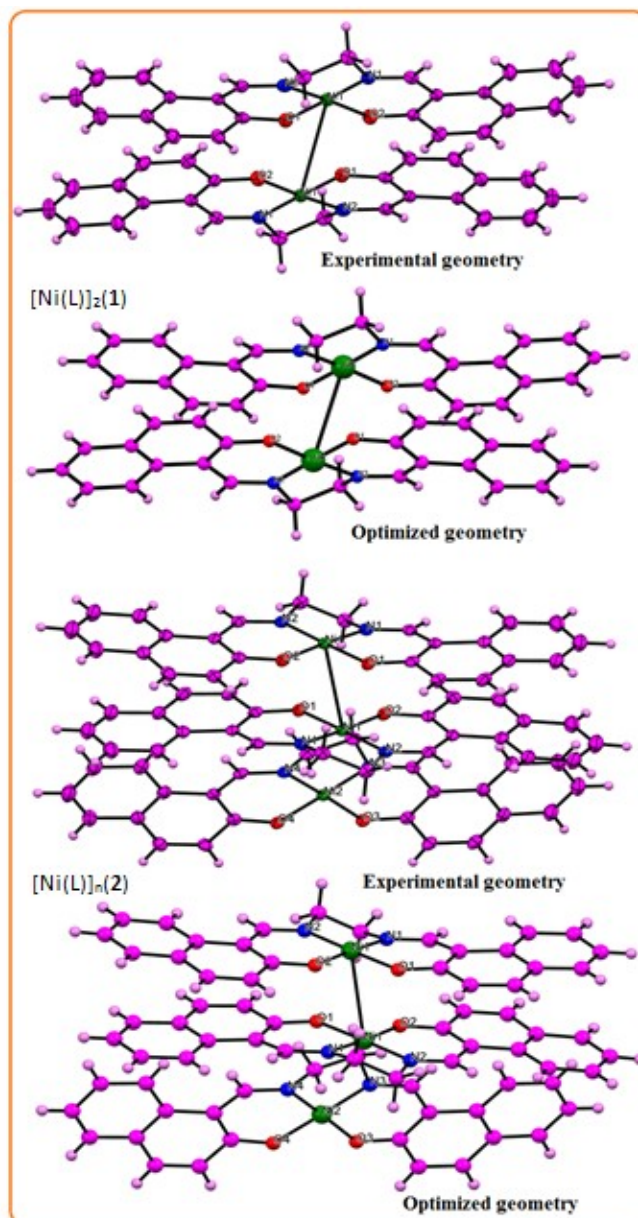

**Figure S32.** Molecular coordination and optimized geometry of the Ni(II) coordination complexes  $[\text{Ni}(\text{L})]_2(\mathbf{1})$  and  $[\text{Ni}(\text{L})]_n(\mathbf{2})$  determined by using X-ray analysis and DFT method, respectively.

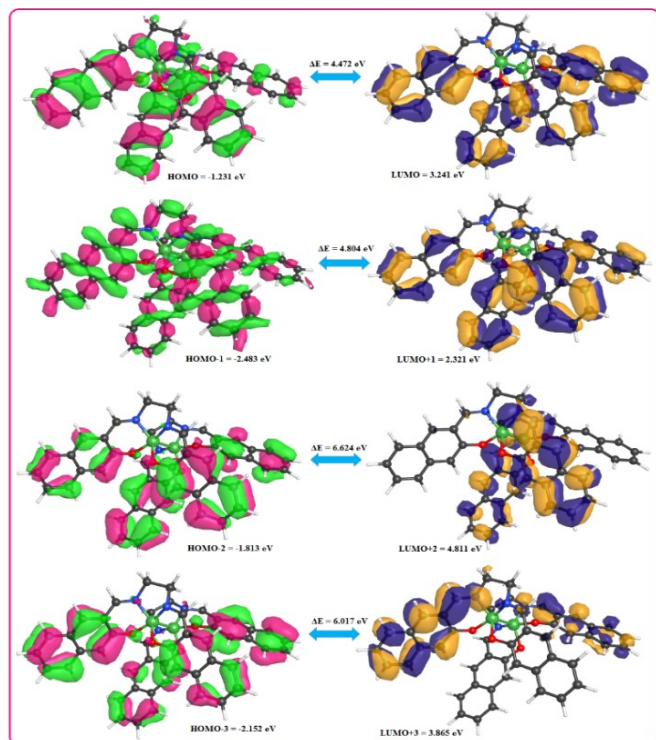

**Figure S33.** Frontier molecular orbital diagram and energy gap ( $\Delta E_g$ ) of the Ni(II) coordination complex  $[\text{Ni}(\text{L})]_2(\mathbf{1})$ .

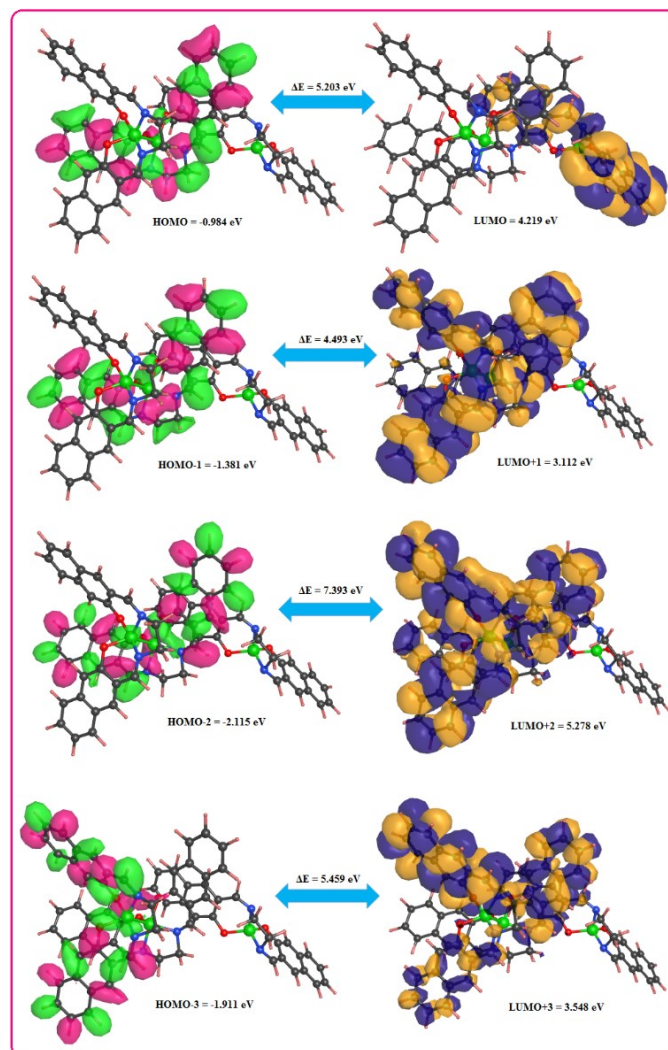

**Figure S34.** Frontier molecular orbital diagram and energy gap ( $\Delta E_g$ ) of the Ni(II) coordination complex  $[\text{Ni}(\text{L})]_n(\mathbf{2})$ .



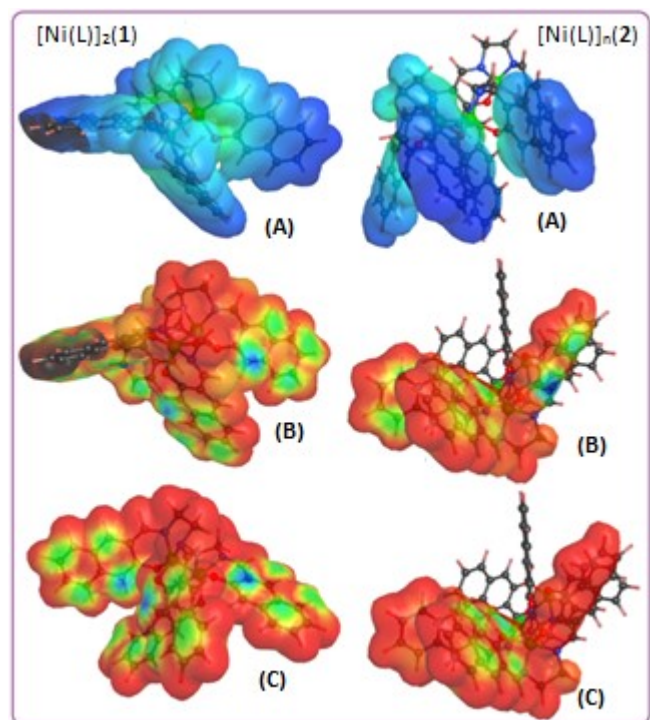

**Figure S35.** (A) Molecular electrostatic potential (MEPs), (B) Nucleophilic (LUMO) frontier density, and (C) Electrophilic (HOMO) frontier density for the Ni(II) coordination complexes  $[\text{Ni}(\text{L})]_2(\mathbf{1})$  and  $[\text{Ni}(\text{L})]_n(\mathbf{2})$ .

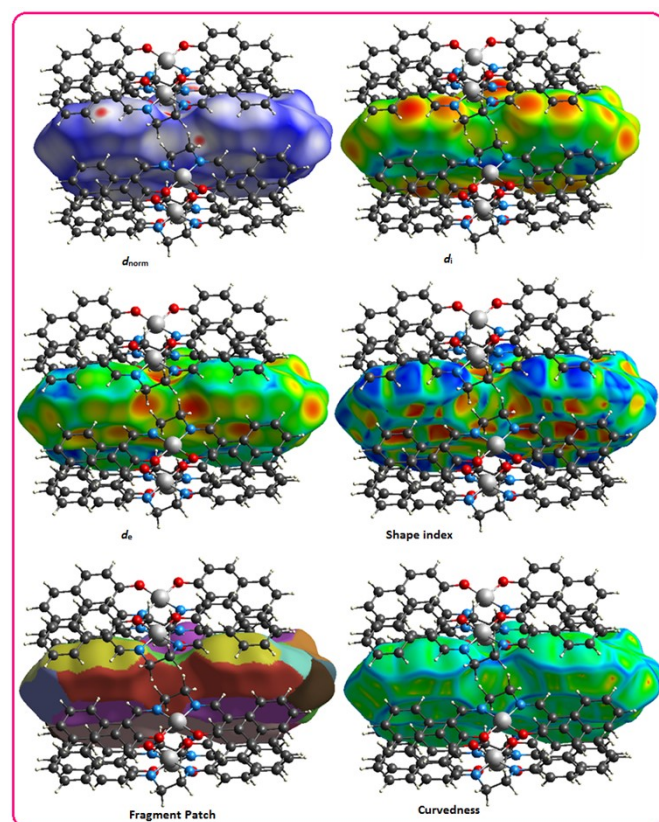

**Figure S36.** Hirshfeld surfaces mapped with  $d_{\text{norm}}$ ,  $d_i$ ,  $d_e$ , shape index, Fragment patch and curvedness for the Ni(II) coordination complex  $[\text{Ni}(\text{L})]_n(\mathbf{2})$ .

$[\text{Ni}(\text{L})]_n(\mathbf{2})$  red spots represents the closest contacts and blue colour the most distant contacts for Ni(II) coordination complex  $[\text{Ni}(\text{L})]_n(\mathbf{2})$ .

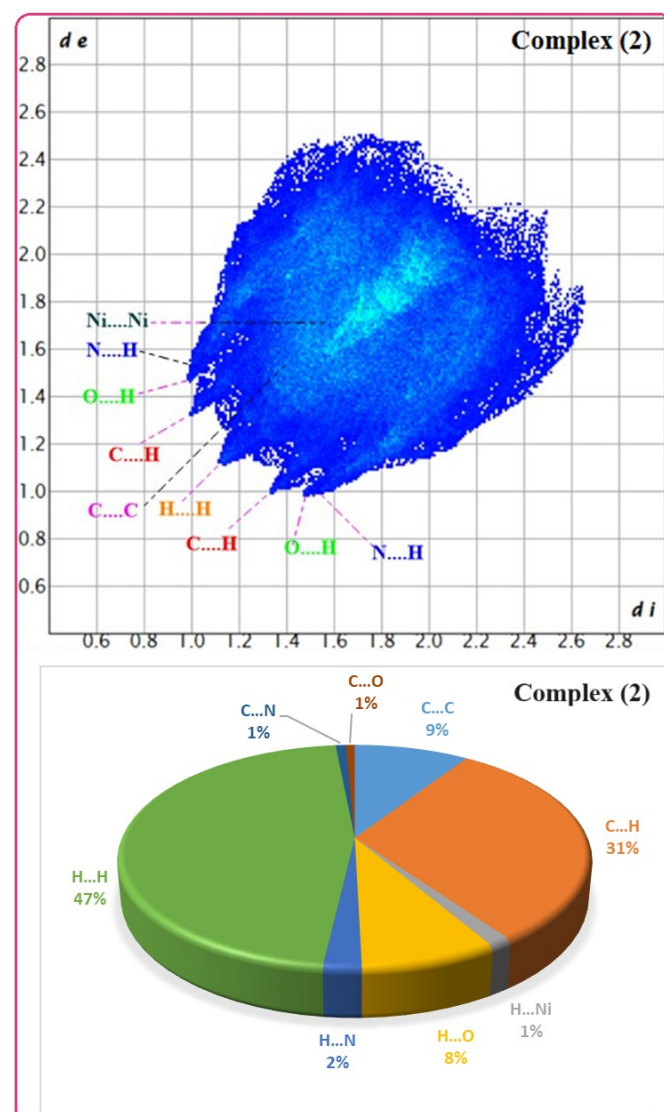

**Figure S37.** Fingerprint plot for the Ni(II) coordination complex  $[\text{Ni}(\text{L})]_n(\mathbf{2})$  showing percentage of contact contributed to the total Hirshfeld surface (HS) area of the molecules and its Pie chart;  $d_i$  and  $d_e$  are the distances from the surface to the nearest atoms interior and exterior to the surface respectively.



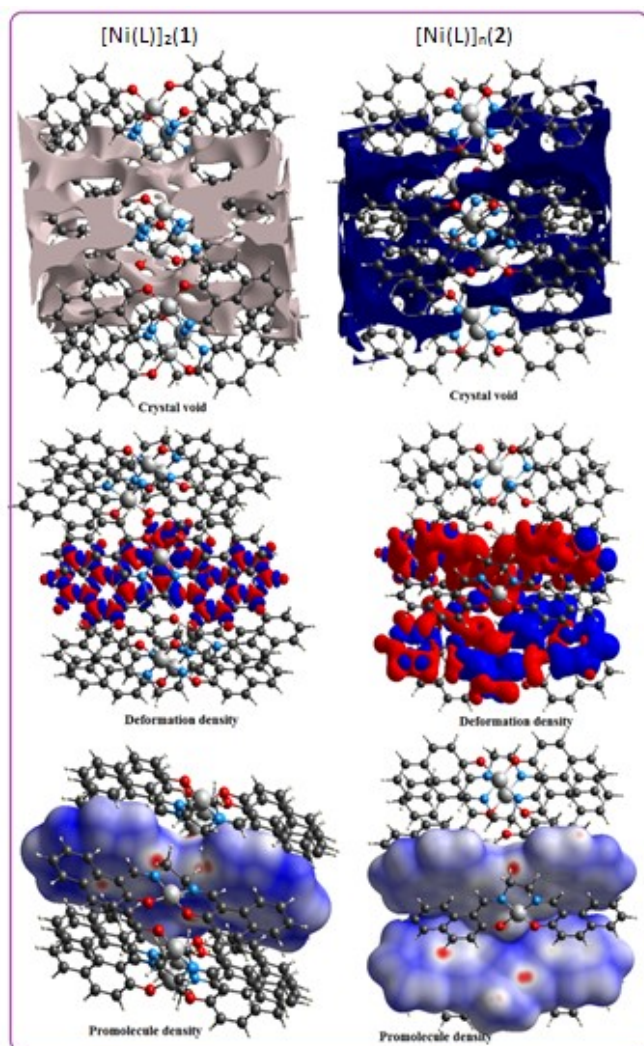

**Figure S38.** Hirshfeld surface mapped with crystal void, deformation density and promolecule density for the Ni(II) coordination complexes  $[\text{Ni}(\text{L})]_2(\mathbf{1})$  and  $[\text{Ni}(\text{L})]_n(\mathbf{2})$ .

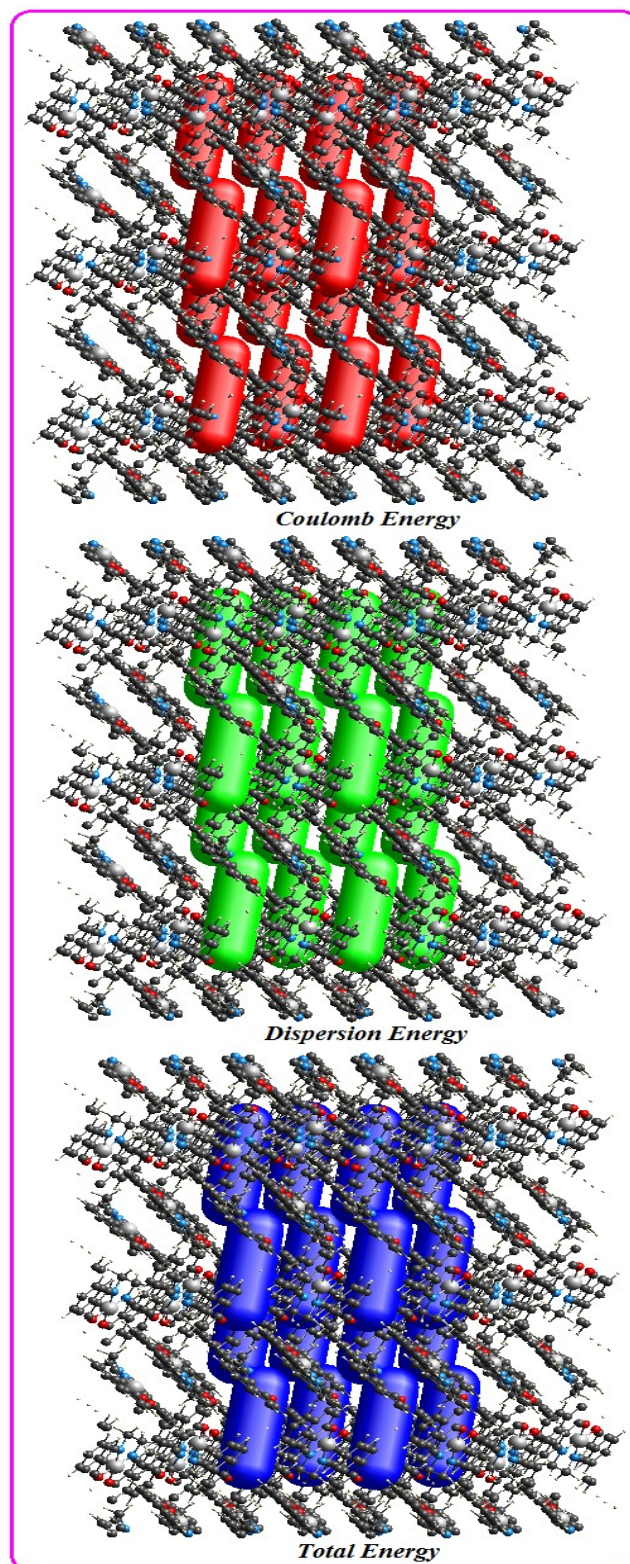

**Figure S39.** 3D graphical representation of energy framework diagram for the Ni(II) coordination complex  $[\text{Ni}(\text{L})]_n(\mathbf{2})$ . Hydrogen atoms have been omitted for clarity and all diagrams used the same hexagonal scale of 200 for energies.



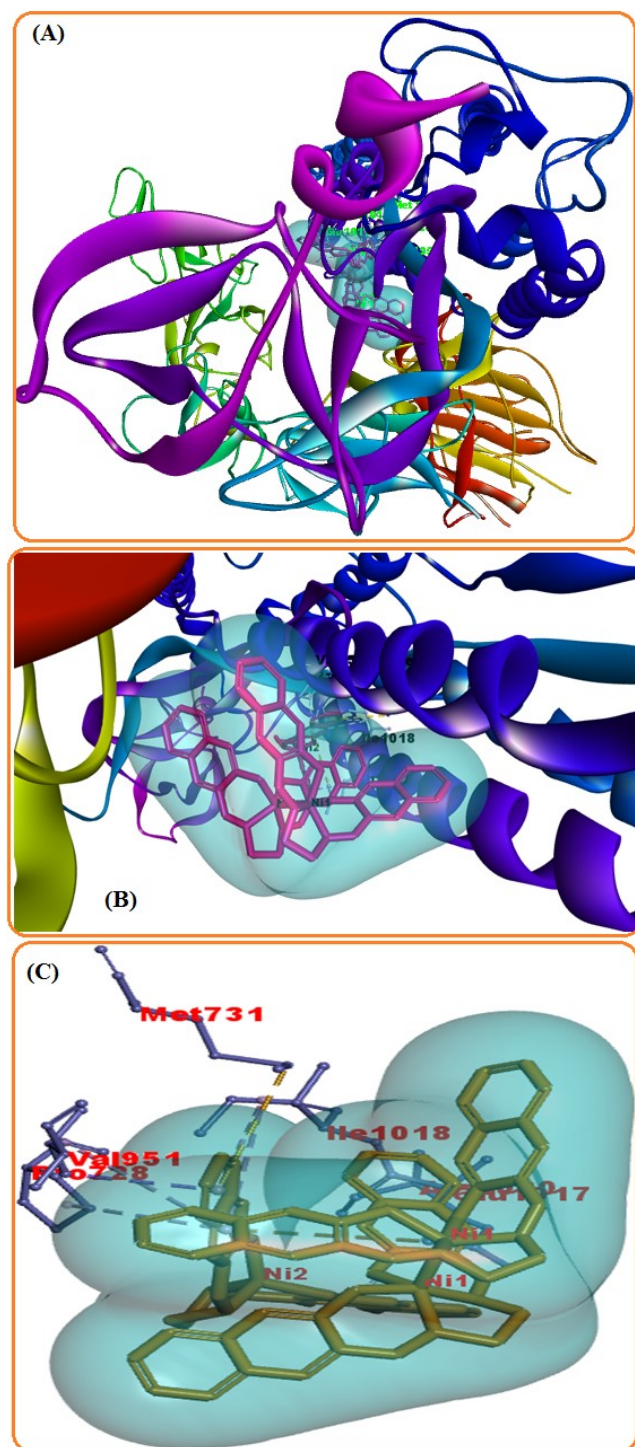

Fi

**figure S40.** (A) Docked Ni(II) coordination complex [Ni(L)]<sub>n</sub>(2) inside Omicron variant of SARS-CoV-2 (PDB ID: 7WK2); (B) Molecular re-docking of the Ni(II) coordination complex [Ni(L)]<sub>n</sub>(2) inside Omicron variant of SARS-CoV-2 focused view for interacting residues and (C) Molecular re-docking of the Ni(II) coordination complex [Ni(L)]<sub>n</sub>(2) with metal-ligand interactions inside Omicron variant of SARS-CoV-2 focused view for interacting residues.

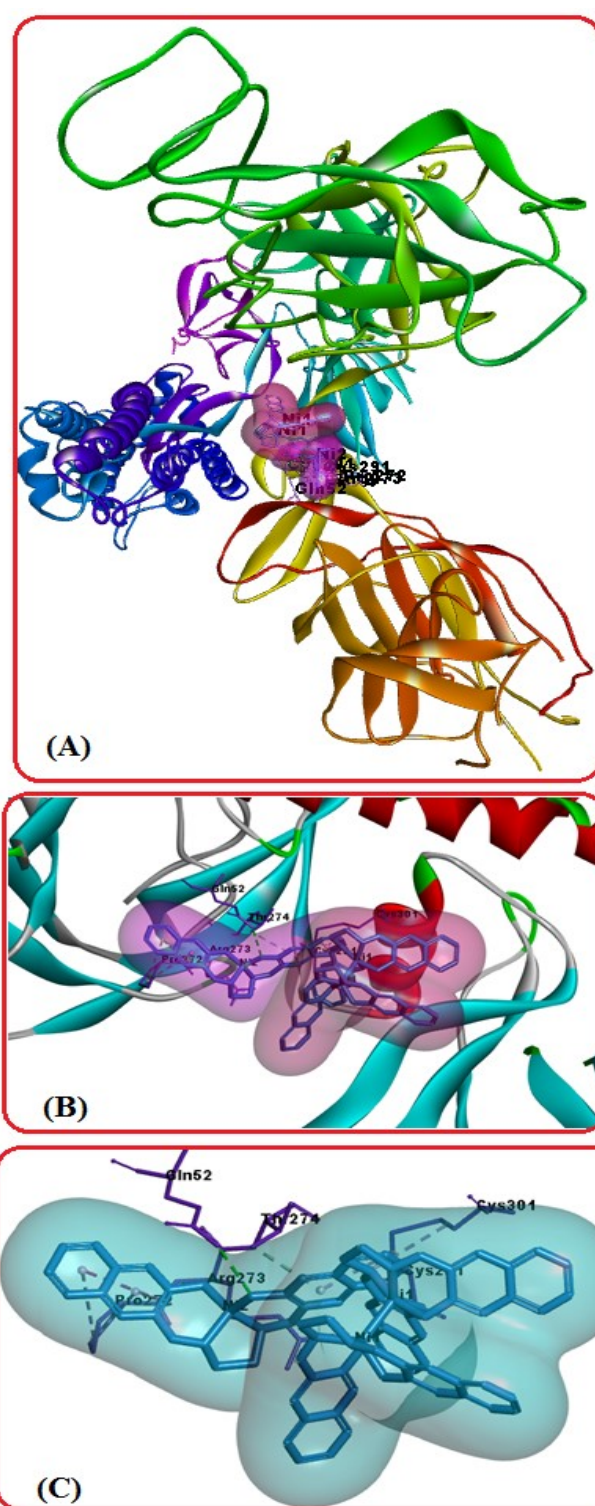

F

**figure S41.** (A) Docked Ni(II) coordination complex [Ni(L)]<sub>n</sub>(2) inside Omicron variant of SARS-CoV-2 (PDB ID: 7WVO); (B) Molecular re-docking of the Ni(II) coordination complex [Ni(L)]<sub>n</sub>(2) inside Omicron variant of SARS-CoV-2 focused view for interacting residues; and (C) Molecular re-docking of the Ni(II) coordination complex [Ni(L)]<sub>n</sub>(2) with metal-ligand interactions inside Omicron variant of SARS-CoV-2 focused view for interacting residues.



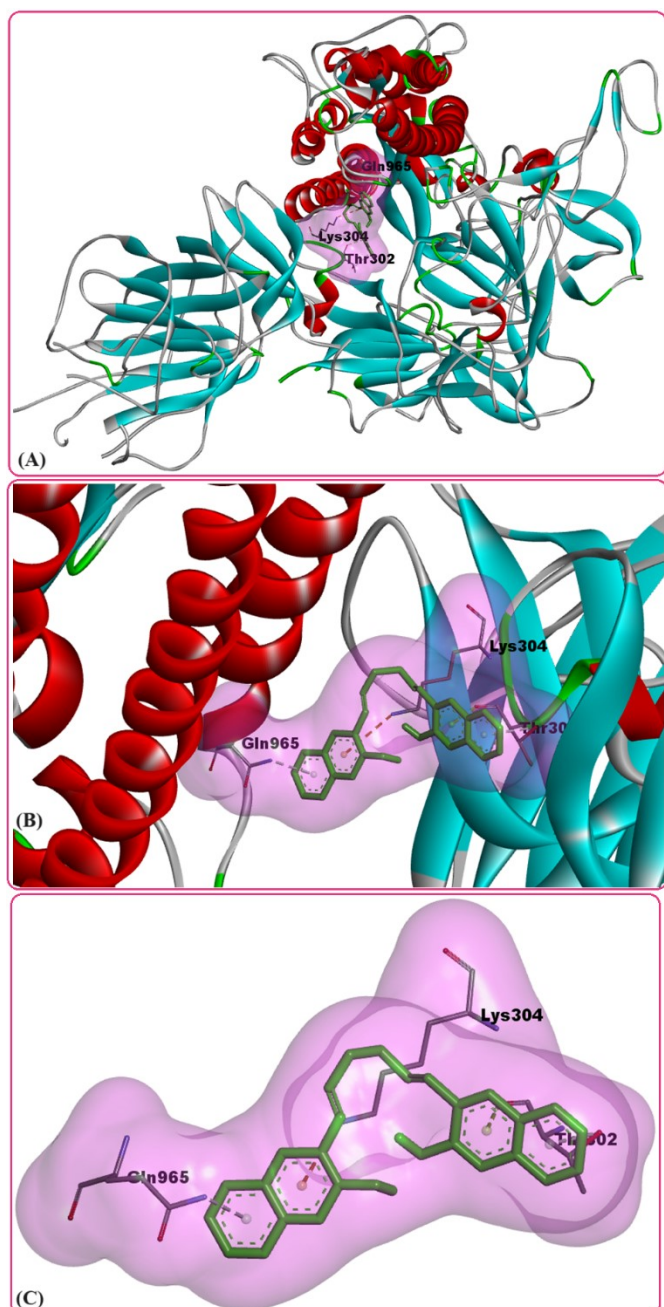

**Figure S42.** (A) Docked Schiff base ligand (H<sub>2</sub>L) inside Omicron variant of SARS-CoV-2 (PDB ID: 7WK2); (B) Molecular re-docking of Schiff base ligand (H<sub>2</sub>L) inside Omicron variant of SARS-CoV-2 focused view for interacting residues and (C) Molecular re-docking of Schiff base ligand (H<sub>2</sub>L) with ligand interactions inside Omicron variant of SARS-CoV-2 focused view for interacting residues.

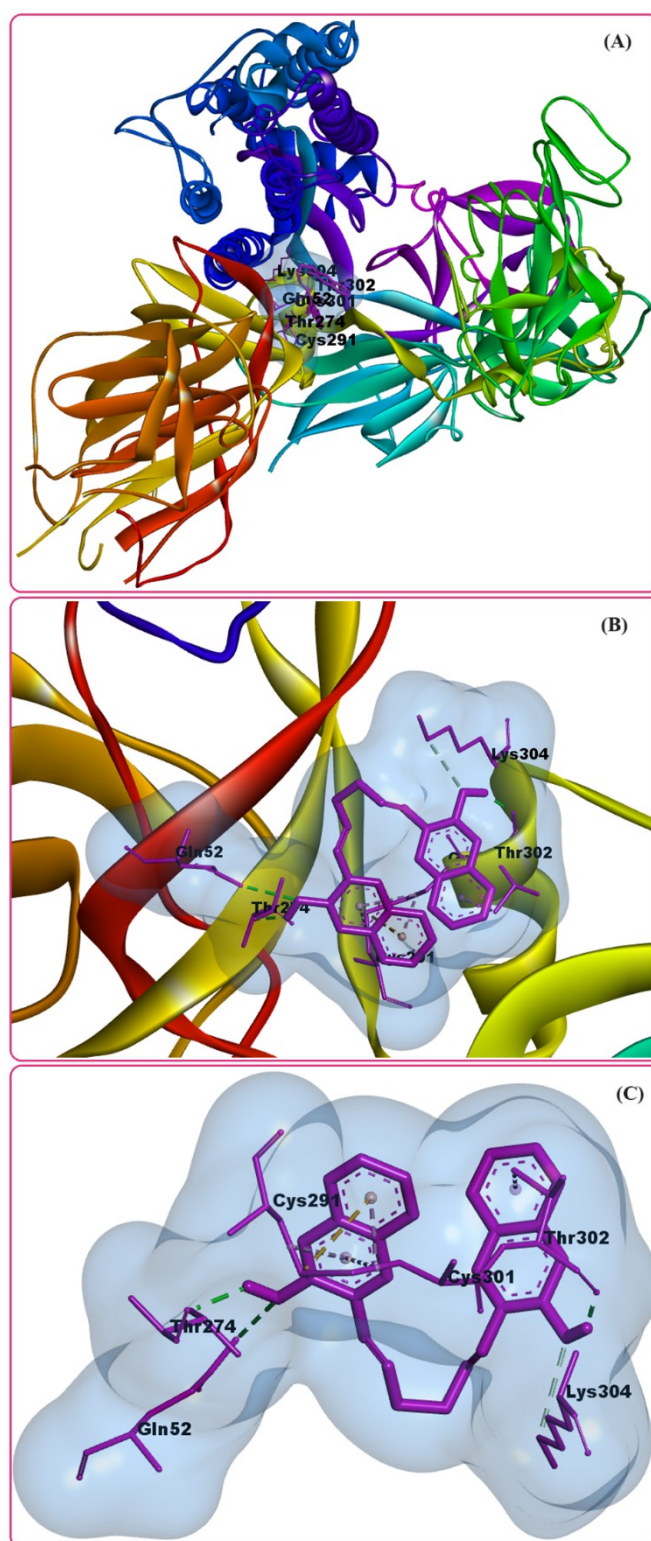

**Figure S43.** (A) Docked Schiff base ligand (H<sub>2</sub>L) inside Omicron variant of SARS-CoV-2 (PDB ID: 7WVO); (B) Molecular re-docking of Schiff base ligand (H<sub>2</sub>L) inside Omicron variant of SARS-CoV-2 focused view for interacting residues and (C) Molecular re-docking of Schiff base ligand (H<sub>2</sub>L) with ligand interactions inside Omicron variant of SARS-CoV-2 focused view for interacting residues.



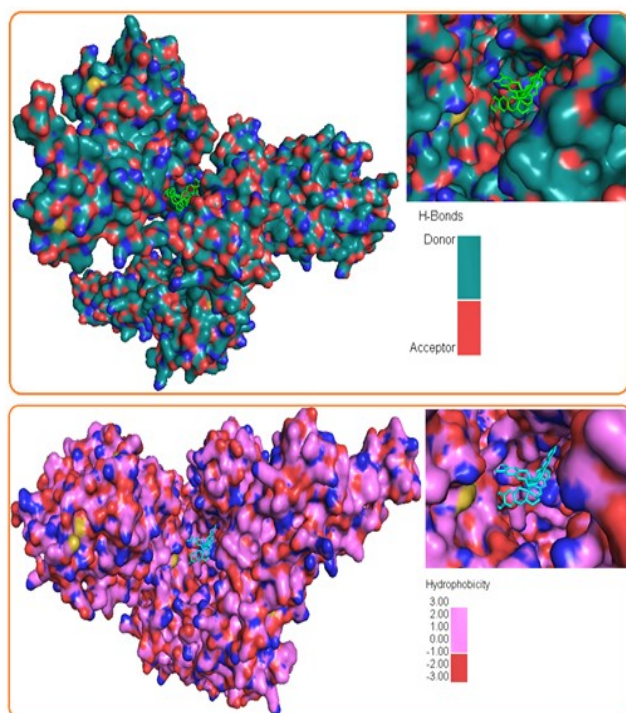

**Figure S44.** Electrostatic surface representation with H-bonds and Hydrophobicity of docked Ni(II) coordination complex  $[\text{Ni}(\text{L})]_2(1)$  inside Omicron variant of SARS-CoV-2 (PDB ID: 7WK2). The ligand (complex) was rendered using the stick representation.

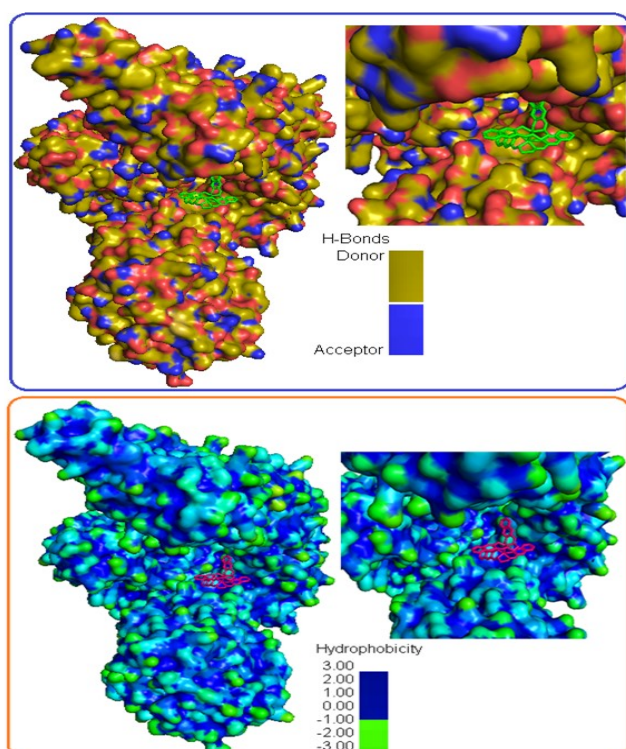

**Figure S45.** Electrostatic surface representation with H-bonds and Hydrophobicity for docked Ni(II) coordination complex  $[\text{Ni}(\text{L})]_2(1)$  inside Omicron variant of SARS-CoV-2 (PDB ID: 7WVO). The ligand (complex) was rendered using the stick representation.

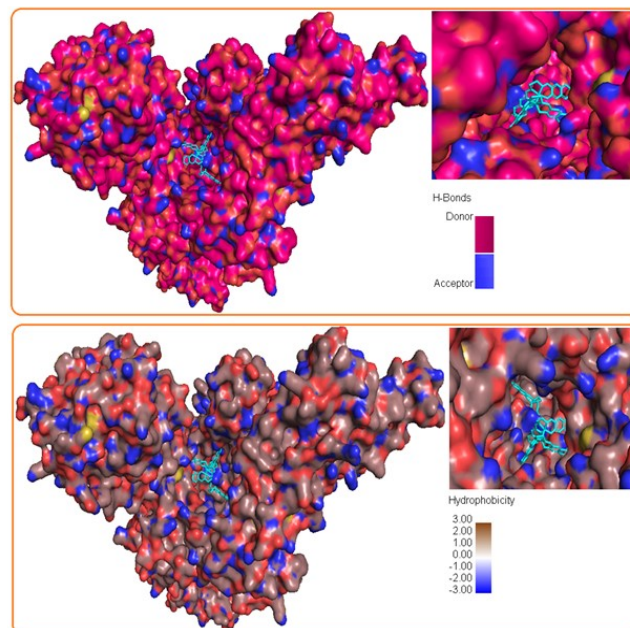

**Figure S46.** Electrostatic surface representation with H-bonds and Hydrophobicity of docked Ni(II) coordination complex  $[\text{Ni}(\text{L})]_n(2)$  inside Omicron variant of SARS-CoV-2 (PDB ID: 7WK2). The ligand (complex) was rendered using the stick representation. Non polar Hydrogen atoms were omitted for clarity.

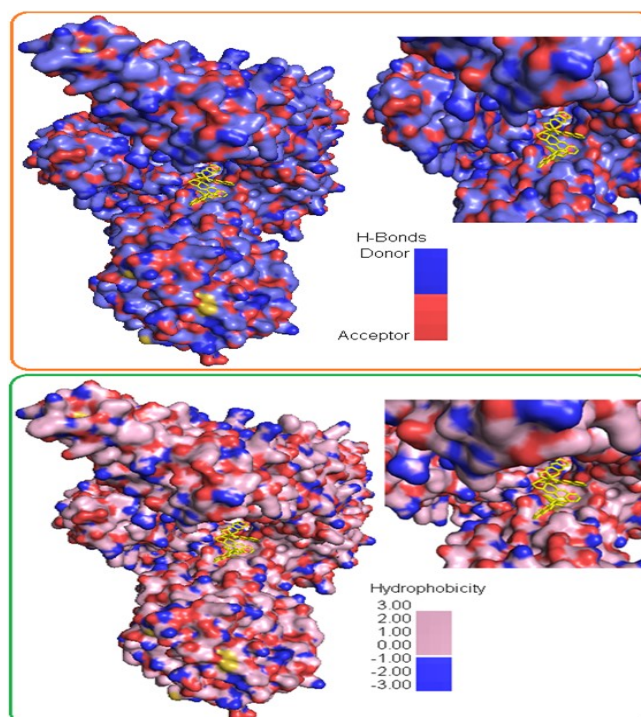

**Figure S47.** Electrostatic surface representation with H-bonds and Hydrophobicity of docked Ni(II) coordination complex  $[\text{Ni}(\text{L})]_n(2)$  inside Omicron variant of SARS-CoV-2 (PDB ID: 7WVO). The ligand (complex) was rendered using the stick representation. Non polar Hydrogen atoms were omitted for clarity.

**Figure S48.** Graphical representation of H-bonds and hydrophobicity of **docked** Schiff base ligand (H<sub>2</sub>L) inside Omicron variant of SARS-CoV-2 (PDB ID: 7WK2 and 7WVO).

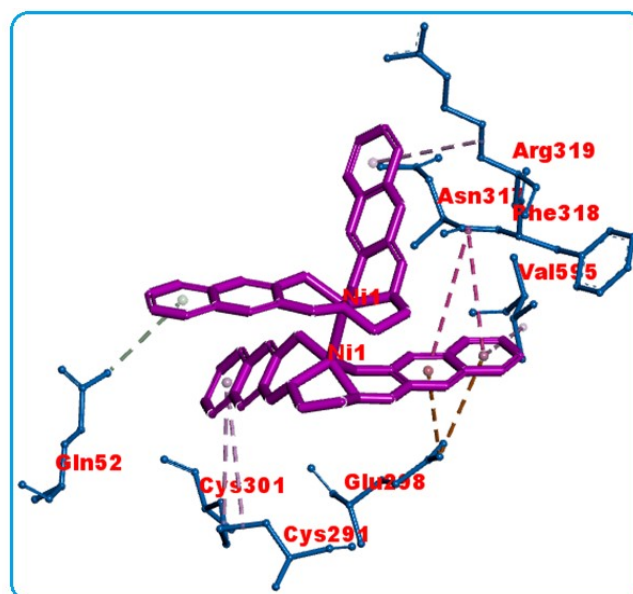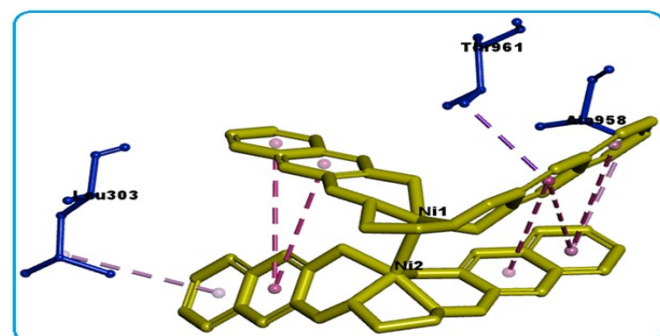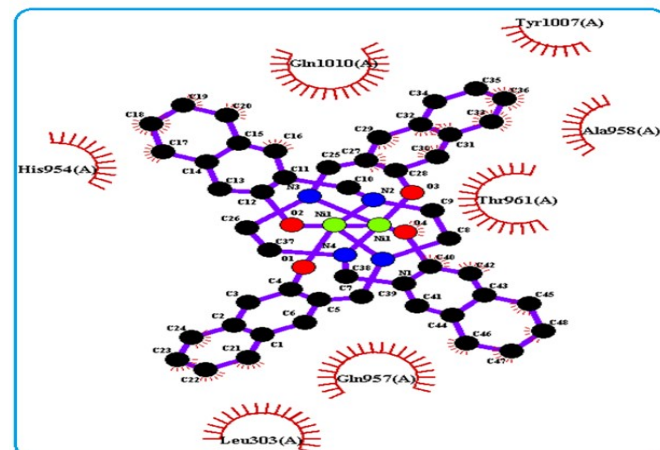

**Figure S49.** Putative 2D and 3D binding mode, and metal-ligand binding interaction of the Ni(II) coordination complex  $[\text{Ni}(\text{L})_2](\mathbf{1})$  (lime yellow coloured) within active pocket of SARS-CoV-2 Omicron S-open-2 (PDB ID: 7WK2).

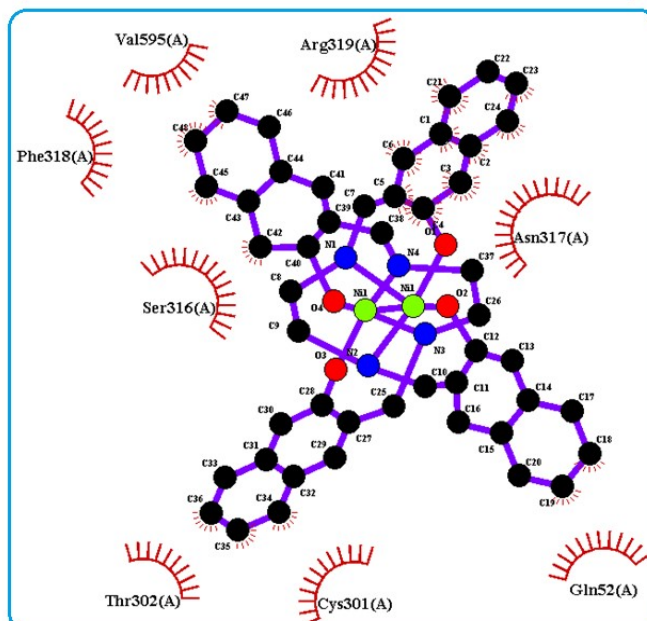

**Figure S50.** Putative 2D and 3D binding mode, and metal-ligand binding interaction of **the** Ni(II) coordination complex  $[\text{Ni}(\text{L})_2](\mathbf{1})$  (pink coloured) within active pocket of SARS-CoV-2 Omicron S-open-2 (PDB ID: 7WVO).



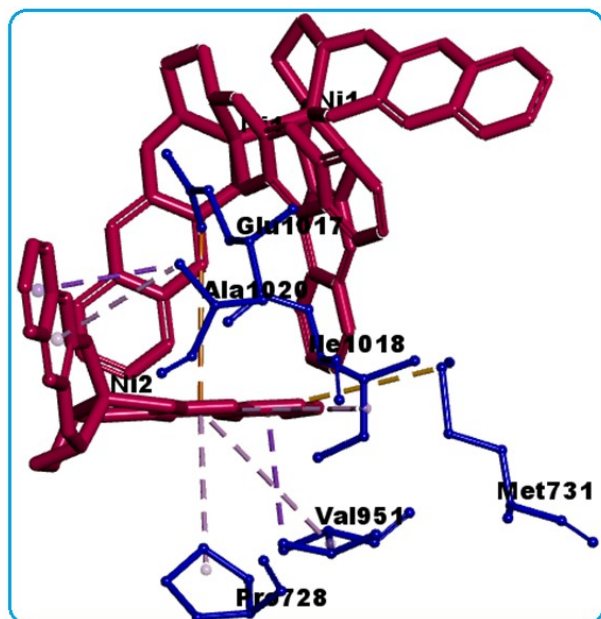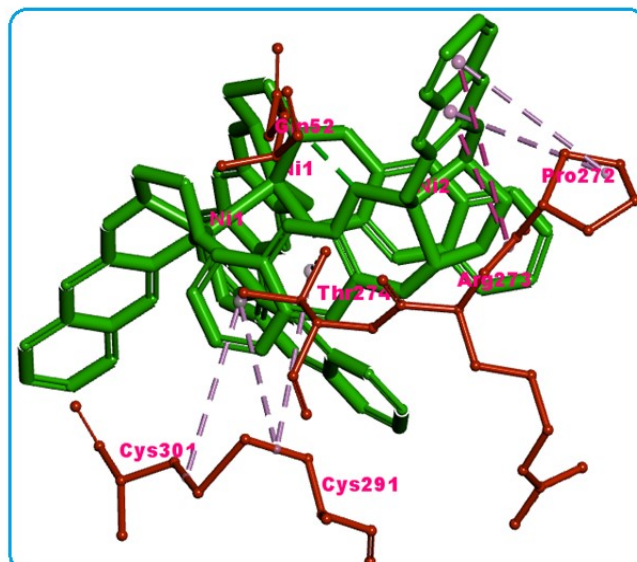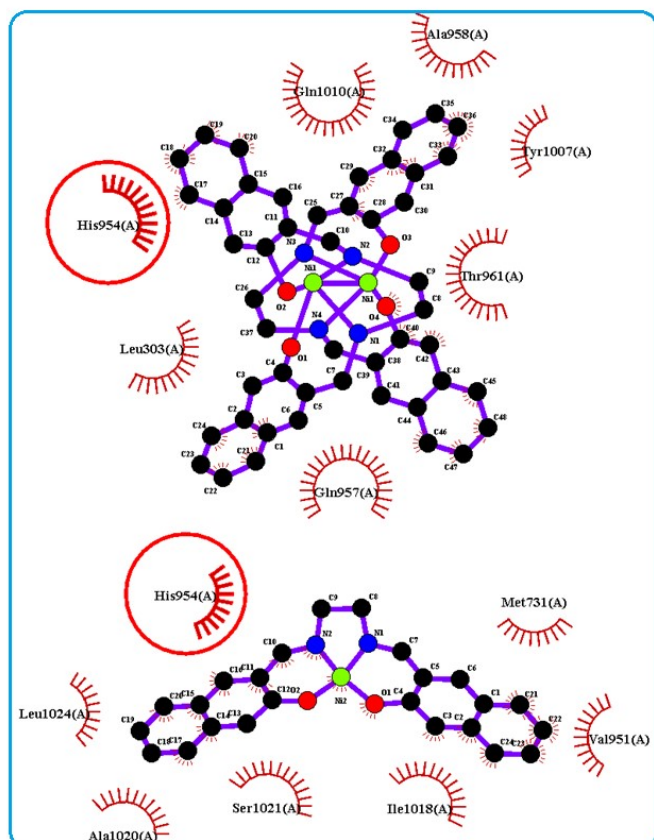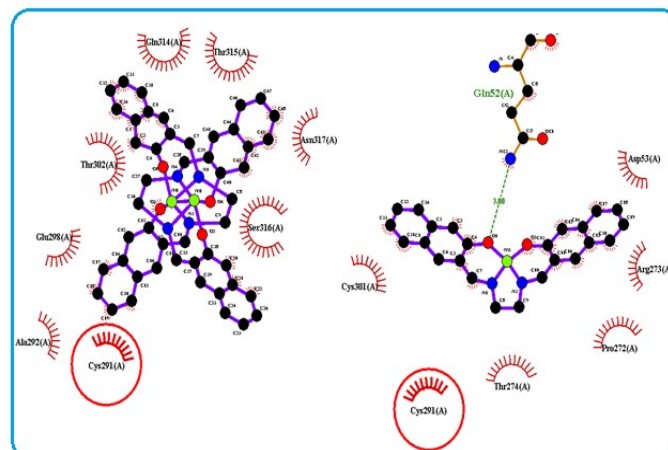

**Figure S51.** Putative 2D and 3D binding mode, and metal-ligand binding interaction of the Ni(II) coordination complex  $[\text{Ni}(\text{L})]_n(\mathbf{2})$  (lime yellow coloured) within active pocket of SARS-CoV-2 Omicron S-open-2 (PDB ID: 7WK2).

**Figure S52.** Putative 2D and 3D binding mode, and metal-ligand binding interaction of the Ni(II) coordination complex  $[\text{Ni}(\text{L})]_n(\mathbf{2})$  (green coloured) within active pocket of SARS-CoV-2 Omicron S-open-2 (PDB ID: 7WVO).



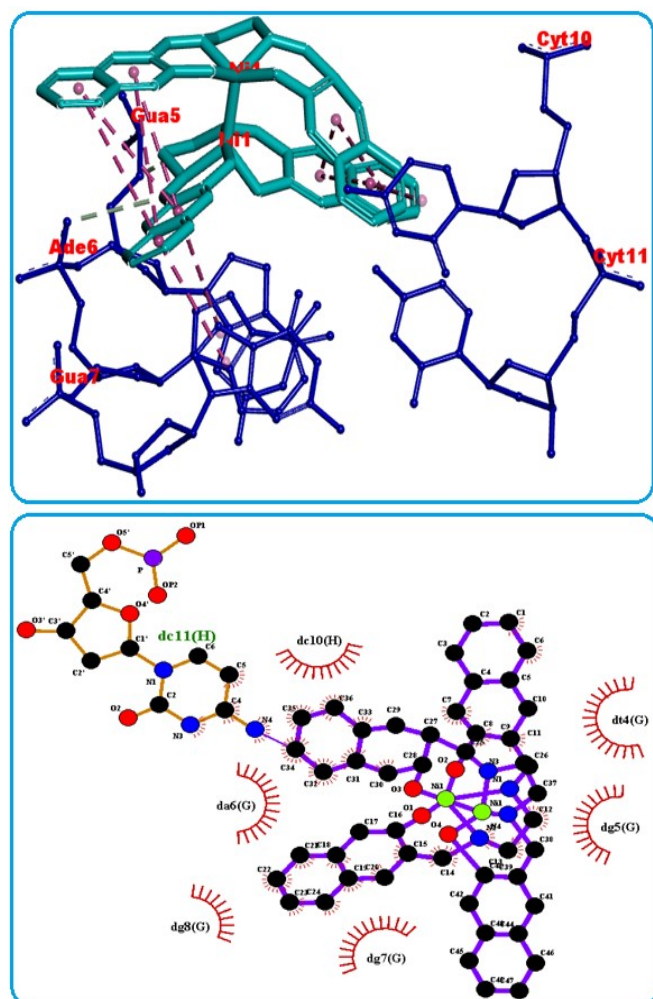

**Figure S53.** Putative 2D and 3D binding mode, and metal-ligand binding interaction of the Ni(II) coordination complex  $[\text{Ni}(\text{L})]_2(\mathbf{1})$  (cyan coloured) within active pocket of OSPHR2 in complex with DNA binding protein (PDB ID: 7D3T).

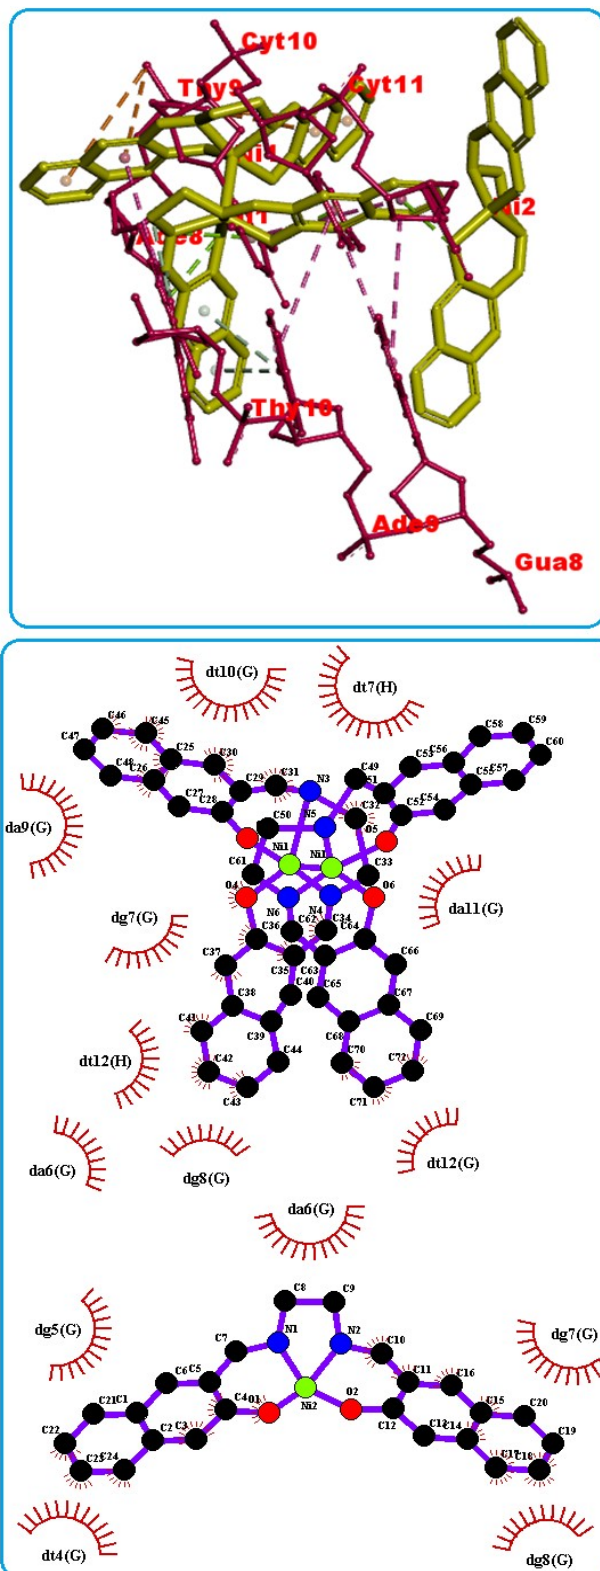

Fig

**Figure S54.** Putative 2D and 3D binding mode, and metal ligand binding interaction of the Ni(II) coordination complex  $[\text{Ni}(\text{L})]_n(\mathbf{2})$  (lime coloured) within active pocket of OSPHR2 in complex with DNA binding protein (PDB ID: 7D3T).

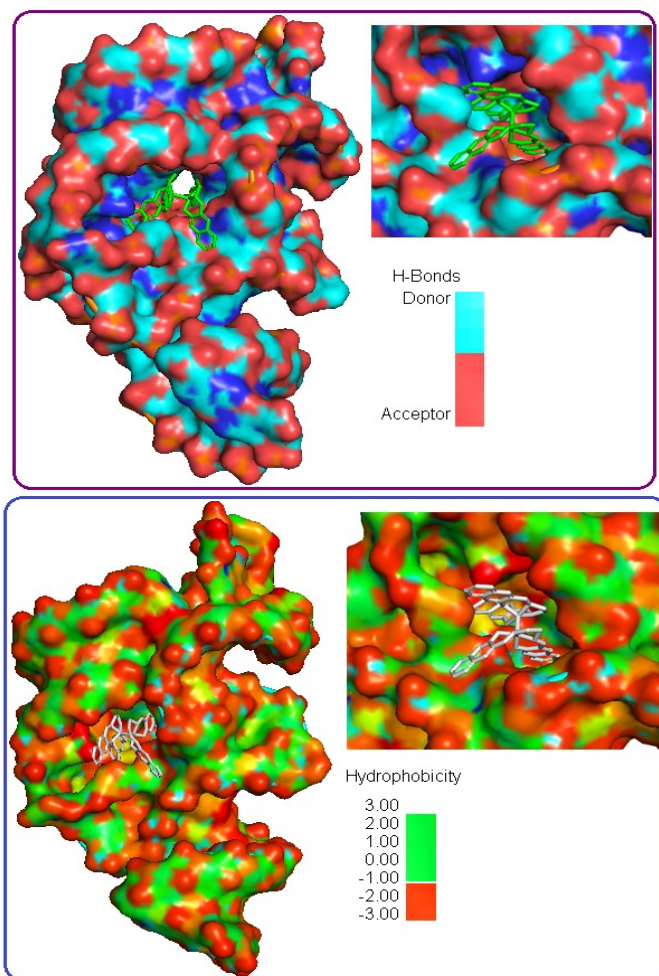

**Figure S55.** Surface representation with H-bond and hydrophobicity of the Ni(II) coordination complex  $[\text{Ni}(\text{L})]_2(\mathbf{1})$  (yellow coloured) within active pocket of E. Coli thiM riboswitch in complex with RNA (PDB ID: 7TDC).

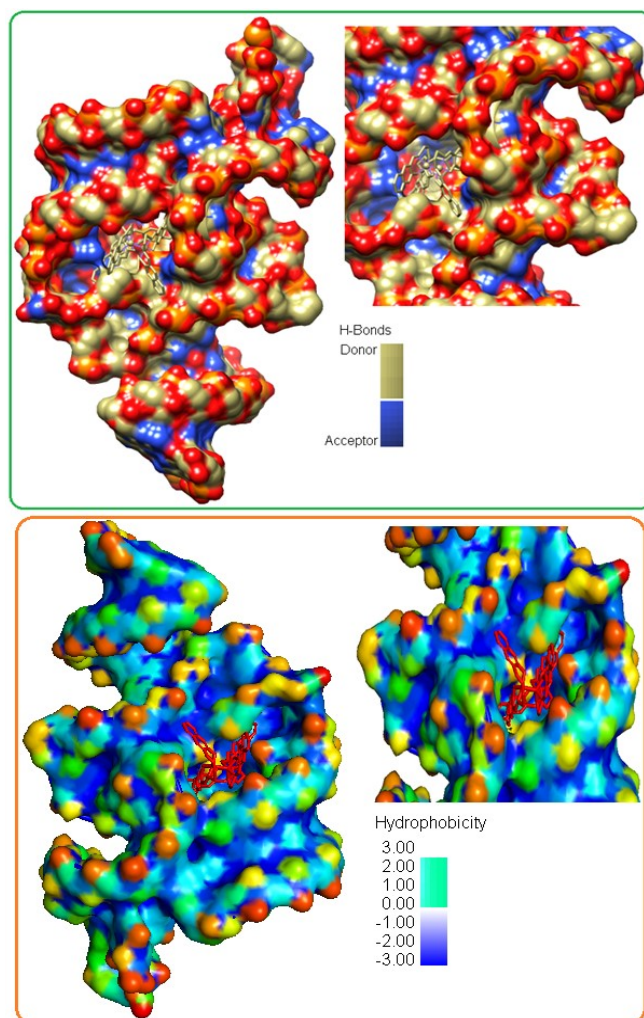

**Figure S56.** Surface representation with H-bond and hydrophobicity of the Ni(II) coordination complex  $[\text{Ni}(\text{L})]_n(\mathbf{2})$  (yellow coloured) within active pocket of E. Coli thiM riboswitch in complex with RNA (PDB ID: 7TDC).



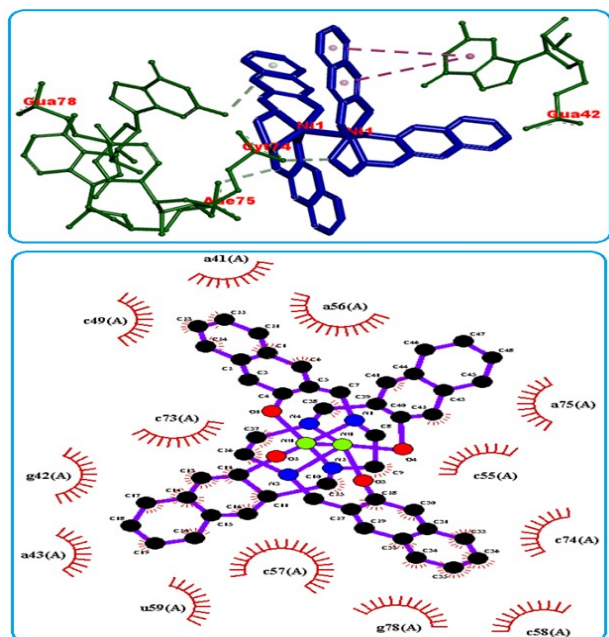

**Figure S57.** Putative 2D and 3D binding mode, and metal-ligand binding interaction of the Ni(II) coordination complex  $[\text{Ni}(\text{L})]_2(\mathbf{1})$  (blue coloured) within active pocket of E. Coli thiM riboswitch in complex with RNA (PDB ID: 7TDC).

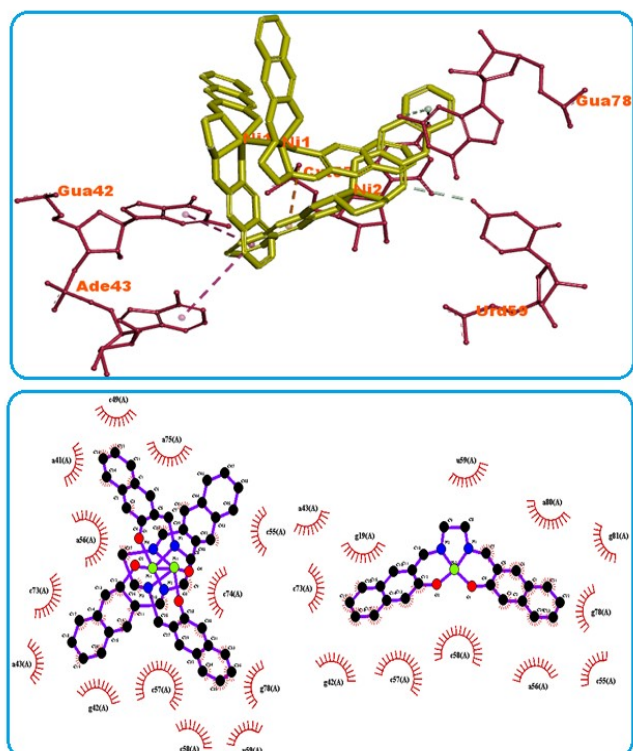

**Figure S58.** Putative 2D and 3D binding mode, and metal-ligand binding interaction of the Ni(II) coordination complex  $[\text{Ni}(\text{L})]_n(\mathbf{2})$  (yellow coloured) within active pocket of E. Coli thiM riboswitch in complex with RNA (PDB ID: 7TDC).

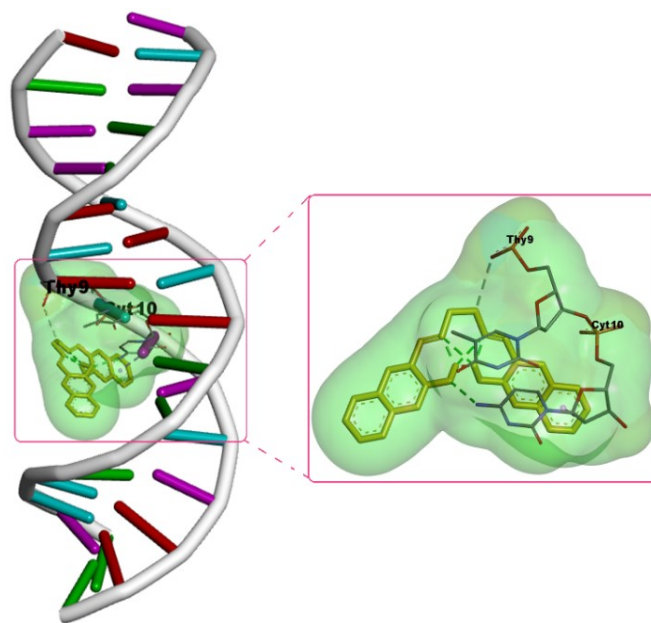

**Figure S59.** Molecular docking and binding interactions of Schiff base ligand ( $\text{H}_2\text{L}$ ) within active pocket of OSPHR2 in complex with DNA binding protein (PDB ID: 7D3T).

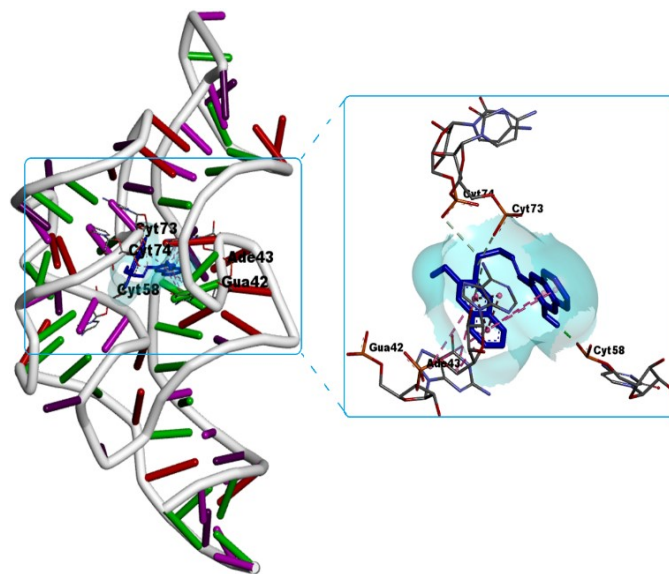

**Figure S60.** Molecular docking and binding interactions of Schiff base ligand ( $\text{H}_2\text{L}$ ) within active pocket of E. Coli thiM riboswitch in complex with RNA (PDB ID: 7TDC).



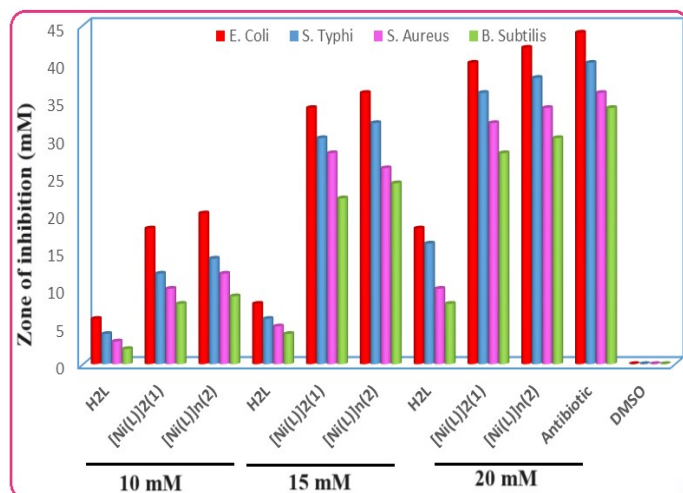

**Figure S61.** Graphical representation of antibacterial screening activity of the Schiff base ligand (H<sub>2</sub>L) and the dimer Ni(II) complexes [Ni(L)]<sub>2</sub>(1) and [Ni(L)]<sub>n</sub>(2) against G(-) and G(+) bacterial strains of microorganisms at different concentrations (10-20 mM) .

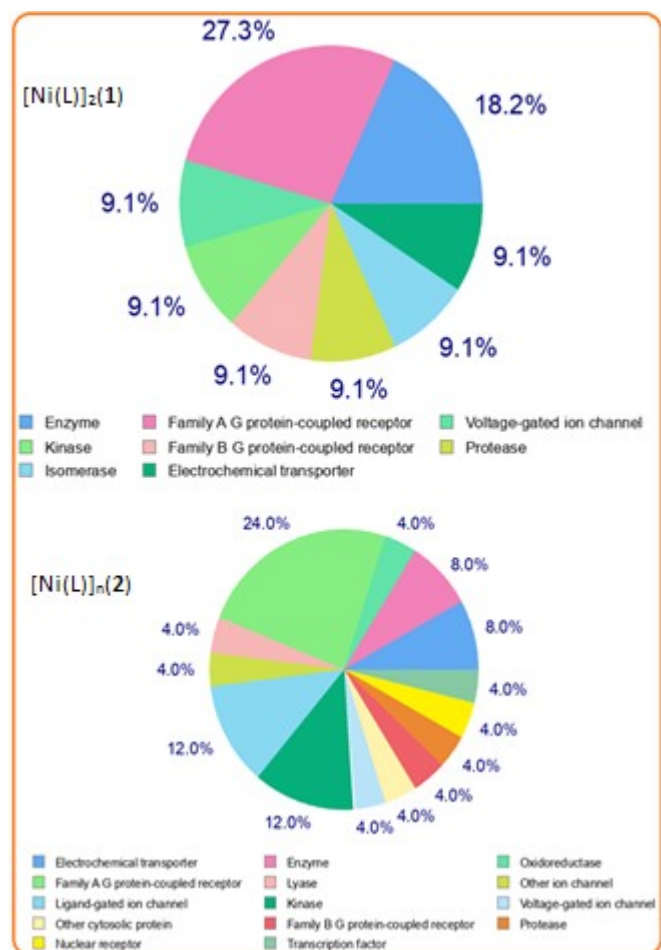

**Figure S62.** Pie chart representation for the Ni(II) coordination complexes [Ni(L)]<sub>2</sub>(1) and [Ni(L)]<sub>n</sub>(2) with Swiss-target predictions.

**Table S1.** Electrochemical cyclic voltammetry data for the Ni(II) coordination complexes [Ni(L)]<sub>2</sub>(1) and [Ni(L)]<sub>n</sub>(2) in DMSO solution containing 1M-TBAP as supporting electrolytes at different scan rates.

| Scan rate (mV/s) | E <sub>pc</sub> (mV) | I <sub>pc</sub> (μA) | E <sub>pa</sub> (mV) | I <sub>pa</sub> (μA) | ΔE <sub>p</sub> (mV) | E' <sub>0</sub> (mV) | I <sub>pa</sub> /I <sub>pc</sub> |
|------------------|----------------------|----------------------|----------------------|----------------------|----------------------|----------------------|----------------------------------|
| <b>(1)</b>       |                      |                      |                      |                      |                      |                      |                                  |
| 10               | -0.030               | -2.772               | 0.072                | 3.550                | 0.102                | 0.021                | -0.280                           |
| 20               | -0.094               | -3.695               | 0.119                | 2.934                | 0.213                | 0.012                | -0.794                           |
| 50               | -0.111               | 7.546                | -0.192               | 2.626                | -0.081               | -0.151               | 0.347                            |
| <b>(2)</b>       |                      |                      |                      |                      |                      |                      |                                  |
| 10               | -0.128               | -3.775               | -0.012               | 2.421                | 0.116                | -0.071               | -0.641                           |
| 20               | -0.123               | -4.218               | -0.136               | 2.231                | -0.013               | -0.130               | -0.528                           |
| 50               | -0.171               | 7.560                | -0.141               | 2.213                | 0.030                | -0.156               | 0.292                            |
| 100              | -0.213               | -2.131               | -0.153               | -8.605               | -0.060               | -0.183               | 4.038                            |

$$\Delta E_p = E_{pa} - E_{pc}; E'_0(mV) = (E_{pa} + E_{pc})/2$$

**Table S2.** Hydrogen bond parameters found in the Ni(II) coordination complexes [Ni(L)]<sub>2</sub>(1) and [Ni(L)]<sub>n</sub>(2).

| D-H...A                               | D-H (Å) | H...A (Å) | D...A (Å) | <D-H-A (°) | Symmetry                    |
|---------------------------------------|---------|-----------|-----------|------------|-----------------------------|
| <b>Complex [Ni(L)]<sub>2</sub>(1)</b> |         |           |           |            |                             |
| C13-H13A...O2                         | 1.080   | 2.394     | 3.313     | 142.07     | x <sub>1</sub> -y+1/2+z+1/2 |
| C12-H12B...O2                         | 1.080   | 2.708     | 3.419     | 123.03     | -x+1,-y+1,-z+1              |
| C12-H12B...O1                         | 1.080   | 2.439     | 3.242     | 130.14     | -x+1,-y+1,-z+1              |
| C13-H13B...N2                         | 1.080   | 2.579     | 3.634     | 165.04     | -x+1,-y+2,-z+1              |
| <b>Complex [Ni(L)]<sub>n</sub>(2)</b> |         |           |           |            |                             |
| C34-H34B...O2                         | 1.080   | 2.360     | 3.285     | 142.77     | x, y, z                     |
| C12-H12A...N1                         | 1.080   | 2.482     | 3.543     | 167.34     | -x+2,-y,-z+1                |
| C12-H12B...O3                         | 1.080   | 2.419     | 3.342     | 142.62     | x <sub>1</sub> +y-1,z       |
| C13-H13A...O1                         | 1.080   | 2.544     | 3.276     | 124.30     | -x+1,-y,-z+1                |
| C13-H13A...O2                         | 1.080   | 2.615     | 3.311     | 121.53     | -x+1,-y,-z+1                |
| C34-H34A...N4                         | 1.080   | 2.673     | 3.714     | 161.58     | -x+1,-y+1,-z+1              |
| C35-H35A...O4                         | 1.080   | 2.354     | 3.202     | 134.27     | -x+2,-y+1,-z+1              |
| C35-H35A...O3                         | 1.080   | 2.792     | 3.511     | 123.89     | -x+2,-y+1,-z+1              |
| C45-H45...O2                          | 1.080   | 2.858     | 3.759     | 140.98     | -x+2,-y+1,-z+1              |

**Table S3.** Energy framework CE-B3LYP estimates of energy components and total energies (kJ/mol) for the closest intermolecular interactions in the Ni(II) complexes [Ni(L)]<sub>2</sub>(1) and [Ni(L)]<sub>n</sub>(2).

| N                                                | Symop             | R     | Electron Density | E_ele | E_pol | E_dis  | E_rep | E_tot  |
|--------------------------------------------------|-------------------|-------|------------------|-------|-------|--------|-------|--------|
| 2                                                | x, -y+1/2, z+1/2  | 18.00 | HF/3-21G         | 2.0   | -0.4  | -7.1   | 0.0   | -4.7   |
| 2                                                | x, y, z           | 17.87 | HF/3-21G         | -2.9  | -0.5  | -8.6   | 0.0   | -11.0  |
| 2                                                | -x, y+1/2, -z+1/2 | 17.34 | HF/3-21G         | -0.1  | -0.4  | -6.1   | 0.0   | -5.8   |
| 1                                                | -x, -y, -z        | 18.43 | HF/3-21G         | 1.6   | -0.1  | -1.0   | 0.0   | 0.6    |
| 2                                                | -x, y+1/2, -z+1/2 | 6.12  | HF/3-21G         | -8.0  | -5.5  | -46.6  | 17.0  | -40.0  |
| 2                                                | x, -y+1/2, z+1/2  | 6.70  | HF/3-21G         | -25.6 | -11.8 | -43.2  | 28.9  | -49.3  |
| 1                                                | -x, -y, -z        | 3.52  | HF/3-21G         | -45.6 | -30.0 | -163.5 | 98.6  | -133.3 |
| 2                                                | -x, y+1/2, -z+1/2 | 9.62  | HF/3-21G         | 2.7   | -0.9  | -3.8   | 0.0   | -1.2   |
| 1                                                | -x, -y, -z        | 6.00  | HF/3-21G         | -28.9 | -8.9  | -60.2  | 28.2  | -66.5  |
| 1                                                | -x, -y, -z        | 18.64 | HF/3-21G         | -0.6  | -0.2  | -4.7   | 0.0   | -4.9   |
| Energy Model [Ni(L)] <sub>2</sub> (1)            |                   |       |                  | k_ele | k_pol | k_dis  | k_rep |        |
| CE+HF ... HF/3-21G electron densities            |                   |       |                  | 1.019 | 0.651 | 0.901  | 0.811 |        |
| CE-B3LYP ... B3LYP/6-31G(d,p) electron densities |                   |       |                  | 1.057 | 0.740 | 0.871  | 0.618 |        |

  

| N                                                | Symop             | R     | Electron Density | E_ele  | E_pol | E_dis | E_rep | E_tot |
|--------------------------------------------------|-------------------|-------|------------------|--------|-------|-------|-------|-------|
| 2                                                | x, -y+1/2, z+1/2  | 18.00 | HF/3-21G         | 3.1    | -0.5  | -7.7  | 0.1   | -4.5  |
| 2                                                | x, y, z           | 17.85 | HF/3-21G         | -2.6   | -0.2  | -4.9  | 0.1   | -9.6  |
| 2                                                | -x, y+1/2, -z+1/2 | 17.32 | HF/3-21G         | -0.6   | -0.6  | -2.8  | 0.1   | -5.2  |
| 1                                                | -x, -y, -z        | 18.56 | HF/3-21G         | 2.1    | -1.9  | 1.2   | 0.0   | 0.2   |
| 2                                                | -x, y+1/2, -z+1/2 | 6.35  | HF/3-21G         | -6.8   | -4.5  | -38.2 | 16.2  | -31.6 |
| 2                                                | x, -y+1/2, z+1/2  | 6.78  | HF/3-21G         | -22.3  | -12.3 | -34.5 | 24.6  | -38.5 |
| 1                                                | -x, -y, -z        | 3.21  | HF/3-21G         | -31.23 | -28.7 | -85.2 | 65.1  | -97.4 |
| 2                                                | -x, y+1/2, -z+1/2 | 8.21  | HF/3-21G         | 3.5    | -0.8  | -2.9  | 0.0   | -1.6  |
| 1                                                | -x, -y, -z        | 3.52  | HF/3-21G         | -24.9  | -6.4  | -31.2 | 12.3  | -44.5 |
| 1                                                | -x, -y, -z        | 12.01 | HF/3-21G         | -0.2   | -0.7  | -3.7  | 0.0   | -4.1  |
| Energy Model [Ni(L)] <sub>n</sub> (2)            |                   |       |                  | k_ele  | k_pol | k_dis | k_rep |       |
| CE+HF ... HF/3-21G electron densities            |                   |       |                  | 1.014  | 0.328 | 0.951 | 0.711 |       |
| CE-B3LYP ... B3LYP/6-31G(d,p) electron densities |                   |       |                  | 1.025  | 0.487 | 0.740 | 0.518 |       |

**Table S4.** Established structure activity relationship (SAR) between the experimental geometries of the Ni(II) dimer complexes [Ni(L)]<sub>2</sub>(1) and [Ni(L)]<sub>n</sub>(2) determined by the single crystal X-ray diffraction technique and the theoretical geometries observed upon interactions against SARS-CoV-2 Omicron variants (PDB ID: 7WK2 and 7WVO).

| Complexes                | Experimental bond lengths (Å) |          | Docked complexes inside SARS-CoV-2 Omicron variant with bond lengths (Å) |           |              |           |
|--------------------------|-------------------------------|----------|--------------------------------------------------------------------------|-----------|--------------|-----------|
|                          |                               |          | PDB ID: 7WK2                                                             |           | PDB ID: 7WVO |           |
| [Ni(L)] <sub>2</sub> (1) | Ni(1)-O(1)                    | 1.861(2) | Ni(1)-O(1)                                                               | 1.832(1)  | Ni(1)-O(1)   | 1.866(11) |
|                          | Ni(1)-O(2)                    | 1.860(2) | Ni(1)-O(2)                                                               | 1.854(3)  | Ni(1)-O(2)   | 1.861(4)  |
|                          | Ni(1)-N(1)                    | 1.855(3) | Ni(1)-N(1)                                                               | 1.823(5)  | Ni(1)-N(1)   | 1.842(6)  |
|                          | Ni(1)-N(2)                    | 1.856(3) | Ni(1)-N(2)                                                               | 1.833(13) | Ni(1)-N(2)   | 1.866(4)  |
| [Ni(L)] <sub>n</sub> (2) | Ni(1)-O(1)                    | 1.863(2) | Ni(1)-O(1)                                                               | 1.855(12) | Ni(1)-O(1)   | 1.866(1)  |
|                          | Ni(1)-O(2)                    | 1.922(2) | Ni(1)-O(2)                                                               | 1.913(6)  | Ni(1)-O(2)   | 1.921(2)  |
|                          | Ni(1)-N(1)                    | 1.907(3) | Ni(1)-N(1)                                                               | 1.923(12) | Ni(1)-N(1)   | 1.908(6)  |
|                          | Ni(1)-N(2)                    | 1.855(3) | Ni(1)-N(2)                                                               | 1.846(13) | Ni(1)-N(2)   | 1.861(4)  |
|                          | Ni(2)-O(3)                    | 1.807(2) | Ni(2)-O(3)                                                               | 1.814(11) | Ni(2)-O(3)   | 1.826(1)  |
|                          | Ni(1)-O(4)                    | 1.862(2) | Ni(1)-O(4)                                                               | 1.863(12) | Ni(1)-O(4)   | 1.854(1)  |
|                          | Ni(1)-N(3)                    | 1.856(3) | Ni(1)-N(3)                                                               | 1.861(12) | Ni(1)-N(3)   | 1.861(2)  |
|                          | Ni(1)-N(4)                    | 1.803(3) | Ni(1)-N(4)                                                               | 1.821(1)  | Ni(1)-N(4)   | 1.823(11) |

**Table S5.** Pharmacokinetic properties of the Ni(II) coordination complexes [Ni(L)]<sub>2</sub>(1) and [Ni(L)]<sub>n</sub>(2).

| Property     | Model Name                                                        | Predicted Values for complexes |                          |
|--------------|-------------------------------------------------------------------|--------------------------------|--------------------------|
|              |                                                                   | [Ni(L)] <sub>2</sub> (1)       | [Ni(L)] <sub>n</sub> (2) |
| Absorption   | Water solubility(log mol/L)                                       | -4.205                         | -5.571                   |
|              | Caco <sub>2</sub> permeability(log Papp in 10 <sup>-6</sup> cm/s) | 0.897                          | 1.227                    |
|              | Intestinal absorption (human) (%Absorbed)                         | 98.254                         | 90.982                   |
|              | Skin Permeability(Log Kp)                                         | -2.154                         | -3.413                   |
|              | P-glycoprotein Substrate                                          | No                             | No                       |
|              | P-glycoprotein I inhibitor                                        | Yes                            | Yes                      |
|              | P-glycoprotein II inhibitor                                       | Yes                            | Yes                      |
| Distribution | VDss (human) (log L/kg)                                           | -0.781                         | -0.811                   |
|              | Fraction unbound (human) (Fu)                                     | 0.407                          | 0.409                    |
|              | BBB permeability(log BB)                                          | -1.104                         | -1.109                   |
|              | CNS permeability(log PS)                                          | -0.788                         | -0.798                   |
|              |                                                                   |                                |                          |
| Metabolism   | CYP2D6 substrate                                                  | No                             | No                       |
|              | CYP3A4 substrate                                                  | Yes                            | Yes                      |
|              | CYP1A2 substrate                                                  | Yes                            | Yes                      |
|              | CYP2C19 inhibitor                                                 | Yes                            | Yes                      |
|              | CYP2C9 inhibitor                                                  | Yes                            | Yes                      |
|              | CYP2D6 inhibitor                                                  | No                             | No                       |
|              | CYP3A4 inhibitor                                                  | No                             | No                       |
| Excretion    | Total Clearance (log ml/min/kg)                                   | -0.899                         | -0.904                   |
|              | Renal OCT2 substrate                                              | Yes                            | Yes                      |
| Toxicity     | AMES toxicity                                                     | Yes                            | Yes                      |
|              | Max. tolerated dose (human) (log mg/kg/day)                       | 0.541                          | -0.541                   |
|              | hERG I inhibitor                                                  | No                             | No                       |
|              | hERG II inhibitor                                                 | No                             | No                       |
|              | Oral Rat Acute Toxicity (LD50) (mol/kg)                           | 3.358                          | 3.361                    |
|              | Oral Rat Chronic Toxicity (LOAEL) (log mg/kg_bw/day)              | 2.115                          | 2.115                    |
|              | Hepatotoxicity                                                    | Yes                            | Yes                      |
|              | Skin Sensation                                                    | Yes                            | Yes                      |
|              | T. Pyriformis toxicity(log ug/L)                                  | 0.781                          | 0.785                    |
|              | Minnow toxicity(log Mm)                                           | -5.207                         | -5.207                   |

**Table S6.** Cheminformatics properties of the Ni(II) coordination

| Model Name               | Predicted Value                                                               |                                                                               |
|--------------------------|-------------------------------------------------------------------------------|-------------------------------------------------------------------------------|
|                          | [Ni(L)] <sub>2</sub> ( <b>1</b> )                                             | [Ni(L)] <sub>n</sub> ( <b>2</b> )                                             |
| Molecular Formula        | C <sub>48</sub> H <sub>36</sub> Ni <sub>2</sub> N <sub>4</sub> O <sub>4</sub> | C <sub>72</sub> H <sub>54</sub> Ni <sub>6</sub> N <sub>3</sub> O <sub>6</sub> |
| Molecular Weight (g/mol) | 850.21                                                                        | 1275.34                                                                       |
| GPCR ligand              | -1.93                                                                         | -3.27                                                                         |
| Ion channel modulator    | -3.01                                                                         | -2.05                                                                         |
| Kinase inhibitor         | -2.67                                                                         | -4.29                                                                         |
| Nuclear receptor ligand  | -2.79                                                                         | -1.58                                                                         |
| Protease inhibitor       | -1.41                                                                         | -1.57                                                                         |
| Enzyme inhibitor         | -2.38                                                                         | -3.36                                                                         |
| miLogP                   | -5.48                                                                         | -7.21                                                                         |
| TPSA                     | 48.96                                                                         | 58.63                                                                         |
| natoms                   | 58                                                                            | 87                                                                            |
| nON                      | 8                                                                             | 8                                                                             |
| nOHNH                    | 0                                                                             | 0                                                                             |
| nviolations              | 1                                                                             | 1                                                                             |
| nrotb                    | 1                                                                             | 1                                                                             |
| volume                   | 702.21                                                                        | 869.54                                                                        |
| LogP                     | 4.712                                                                         | 4.813                                                                         |
| Rotatable Bonds          | 4                                                                             | 4                                                                             |
| Acceptors                | 4                                                                             | 6                                                                             |
| Donors                   | 0                                                                             | 0                                                                             |
| Surface area             | 86.36                                                                         | 129.54                                                                        |

complexes

[Ni(L)]<sub>2</sub>(**1**) and[Ni(L)]<sub>n</sub>(**2**).
